# Supplementary material for: Global Establishment Risk of Economically Important Fruit Fly Species (Tephritidae)
Source: PLoS One. 2015 Jan 14;10(1):e0116424. doi: 10.1371/journal.pone.0116424 (PMC4294639; doi:10.1371/journal.pone.0116424)
Supplement: S1 Table — (XLSX) [file pone.0116424.s001.xlsx]

## Sheet: Sheet1
SM lable 1																SM lable 2		SM lable 3												SM lable 4		SM lable 5				SM lable 6
Australia		China		India		Indonesia		Malaysia		Philippines		Singapore		Thailand		Mauritius		Cameroon		Ghana		Kenya		Malawi		Nigeria		South Africa		Mozambique		Argentina		Ecuador		Mexico		USA		Costa Rica		Panama		Brazil		Peru		Venezuela
SOM Index	Scientific name	SOM Index	Scientific name	SOM Index	Scientific name	SOM Index	Scientific name	SOM Index	Scientific name	SOM Index	Scientific name	SOM Index	Scientific name	SOM Index	Scientific name	SOM Index	Scientific name	SOM Index	Scientific name	SOM Index	Scientific name	SOM Index	Scientific name	SOM Index	Scientific name	SOM Index	Scientific name	SOM Index	Scientific name	SOM Index	Scientific name	SOM Index	Scientific name	SOM Index	Scientific name	SOM Index	Scientific name	SOM Index	Scientific name	SOM Index	Scientific name	SOM Index	Scientific name	SOM Index	Scientific name	SOM Index	Scientific name	SOM Index	Scientific name
0.75267	Bactrocera latifrons	0.57919	Bactrocera albistrigata	0.54121	Dacus longicornis	0.39612	Bactrocera zonata	0.58091	Bactrocera dorsalis	0.75267	Bactrocera latifrons	0.58091	Bactrocera dorsalis	0.38613	Bactrocera pedestris	0.57285	Ceratitis cosyra	0.54905	Dacus vertebratus	0.75895	Ceratitis cosyra	0.3902	Ceratitis anonae	0.83724	Bactrocera invadens	0.59296	Ceratitis rosa	0.55161	Bactrocera cucurbitae	0.87993	Ceratitis capitata	0.73874	Anastrepha obliqua	0.59685	Anastrepha montei	0.86799	Ceratitis capitata	0.8292	Anastrepha obliqua	0.53133	Toxotrypana curvicauda	0.50608	Anastrepha grandis	0.72389	Anastrepha chiclayae	0.53133	Toxotrypana curvicauda	0.3554	Anastrepha ludens
0.71783	Bactrocera tau	0.48266	Bactrocera carambolae	0.48266	Bactrocera umbrosa	0.38613	Bactrocera pedestris	0.39612	Bactrocera zonata	0.71783	Bactrocera tau	0.56275	Bactrocera caudata	0.38613	Adrama determinata	0.43441	Dacus vertebratus	0.26558	Ceratitis discussa	0.59296	Ceratitis rosa	0.32841	Trirhithrum nigrum	0.59399	Dacus punctatifrons	0.49209	Ceratitis punctata	0.40756	Dacus momordicae	0.42476	Bactrocera cucurbitae	0.68788	Anastrepha serpentina	0.43403	Anastrepha pickeli	0.62353	Anastrepha manihoti	0.7918	Anastrepha striata	0.50608	Anastrepha grandis	0.44521	Anastrepha macrura	0.53133	Toxotrypana curvicauda	0.50179	Anastrepha leptozona	0.32246	Anastrepha pseudoparallela
0.58091	Bactrocera dorsalis	0.48266	Bactrocera umbrosa	0.38613	Bactrocera papayae	0.38613	Euphranta lemniscata	0.38613	Euphranta lemniscata	0.58091	Bactrocera dorsalis	0.54121	Dacus longicornis	0.20434	Ceratitis capitata	0.35366	Dacus bivittatus	0.2403	Ceratitis quinaria	0.57125	Dacus bivittatus	0.30567	Ceratitis colae	0.55161	Bactrocera cucurbitae	0.40756	Ceratitis rubivora	0.3902	Ceratitis anonae	0.39589	Ceratitis punctata	0.64878	Anastrepha striata	0.42615	Toxotrypana curvicauda	0.57625	Anastrepha pickeli	0.60215	Anastrepha bezzii	0.44521	Anastrepha macrura	0.44521	Anastrepha sororcula	0.50179	Anastrepha limae	0.50179	Anastrepha limae	0.30108	Anastrepha sagittata
0.56275	Bactrocera caudata	0.39612	Bactrocera zonata	0.38613	Adrama determinata	0.36728	Bactrocera correcta	0.36728	Bactrocera correcta	0.57919	Bactrocera albistrigata	0.39612	Bactrocera zonata	0.19306	Bactrocera musae	0.34413	Ceratitis punctata	0.2296	Dacus frontalis	0.55161	Bactrocera cucurbitae	0.26558	Ceratitis discussa	0.49209	Ceratitis punctata	0.30567	Trirhithrum coffeae	0.20783	Acanthiophilus helianthi	0.37219	Dacus vertebratus	0.61961	Anastrepha distincta	0.37115	Anastrepha bezzii	0.51538	Anastrepha antunesi	0.57625	Anastrepha pickeli	0.44521	Anastrepha sororcula	0.32246	Anastrepha pseudoparallela	0.3554	Anastrepha ludens	0.37553	Anastrepha rheediae	0.28398	Anastrepha daciformis
0.54121	Dacus longicornis	0.38613	Bactrocera papayae	0.31113	Bactrocera scutellata	0.34814	Adrama apicalis	0.34814	Adrama apicalis	0.56275	Bactrocera caudata	0.38613	Bactrocera pedestris	0.19306	Bactrocera jarvisi	0.27824	Ceratitis anonae	0.22652	Trirhithrum nigerrimum	0.40756	Ceratitis rubivora	0.2403	Ceratitis quinaria	0.40756	Dacus momordicae	0.26558	Ceratitis discussa	0.20378	Dacus telfaireae	0.3689	Dacus punctatifrons	0.47314	Anastrepha manihoti	0.33205	Anastrepha antunesi	0.50608	Anastrepha grandis	0.51538	Anastrepha antunesi	0.37553	Anastrepha rheediae	0.28398	Anastrepha daciformis	0.30108	Anastrepha sagittata	0.3554	Anastrepha ludens	0.27517	Anastrepha bahiensis
0.48266	Bactrocera carambolae	0.38613	Adrama determinata	0.28959	Bactrocera arecae	0.34574	Bactrocera diversa	0.34574	Bactrocera diversa	0.48266	Bactrocera carambolae	0.36728	Bactrocera correcta	0.19306	Bactrocera bryoniae	0.26354	Ceratitis rubivora	0.20783	Acanthiophilus helianthi	0.26558	Ceratitis discussa	0.22652	Trirhithrum nigerrimum	0.3902	Ceratitis anonae	0.2403	Ceratitis quinaria	0.20378	Dacus humeralis	0.32991	Ceratitis anonae	0.42615	Toxotrypana curvicauda	0.30929	Anastrepha leptozona	0.44521	Anastrepha macrura	0.50608	Anastrepha grandis	0.32246	Anastrepha pseudoparallela	0.2221	Anastrepha ornate	0.2221	Anastrepha ornate	0.30108	Anastrepha sagittata	0.2221	Anastrepha ornate
0.48266	Bactrocera umbrosa	0.28959	Bactrocera arecae	0.28959	Monacrostichus citricola	0.31113	Bactrocera scutellata	0.3066	Acanthiophilus helianthi	0.39612	Bactrocera zonata	0.34574	Bactrocera diversa	0.19306	Bactrocera trivialis	0.26354	Dacus momordicae	0.20458	Bactrocera oleae	0.2403	Ceratitis quinaria	0.20378	Dacus humeralis	0.30567	Trirhithrum coffeae	0.2296	Dacus frontalis	0.10626	Bactrocera latifrons	0.26393	Ceratitis rubivora	0.41128	Anastrepha sororcula	0.30929	Anastrepha limae	0.44521	Anastrepha sororcula	0.50179	Anastrepha leptozona	0.30108	Anastrepha sagittata	0.20121	Bactrocera oleae	0.2143	Anastrepha pallens	0.27517	Anastrepha bahiensis	0.20121	Bactrocera oleae
0.39612	Bactrocera zonata	0.28959	Monacrostichus citricola	0.25161	Bactrocera tuberculata	0.3066	Acanthiophilus helianthi	0.30557	Carpomya vesuviana	0.38613	Bactrocera papayae	0.31113	Bactrocera scutellata	0.19306	Bactrocera munda	0.2219	Ceratitis quinaria	0.20378	Dacus telfaireae	0.2296	Dacus frontalis	0.16369	Trirhithrum albomaculatum	0.2296	Dacus frontalis	0.22652	Trirhithrum nigerrimum	0.10189	Dacus vansomereni	0.26393	Dacus momordicae	0.37115	Anastrepha bezzii	0.28756	Anastrepha daciformis	0.37553	Anastrepha rheediae	0.44521	Anastrepha macrura	0.28398	Anastrepha daciformis	0.20075	Rhagoletis cingulata	0.20121	Bactrocera oleae	0.20121	Bactrocera oleae	0.20075	Rhagoletis cingulata
0.38613	Bactrocera pedestris	0.20434	Ceratitis capitata	0.19306	Bactrocera musae	0.30557	Carpomya vesuviana	0.25161	Bactrocera tuberculata	0.38613	Euphranta lemniscata	0.3066	Acanthiophilus helianthi	0.19306	Bactrocera minax	0.20127	Dacus frontalis	0.20378	Dacus arcuyatus	0.20783	Acanthiophilus helianthi	0.11568	Ceratitis pedestris	0.22652	Trirhithrum nigerrimum	0.20458	Bactrocera oleae	0.089039	Bactrocera zonata	0.19794	Trirhithrum coffeae	0.33205	Anastrepha antunesi	0.2766	Anastrepha ludens	0.32246	Anastrepha pseudoparallela	0.44521	Anastrepha sororcula	0.27517	Anastrepha bahiensis	0.20075	Rhagoletis pomonella	0.20075	Rhagoletis cingulata	0.20075	Rhagoletis cingulata	0.20075	Rhagoletis pomonella
0.38613	Bactrocera papayae	0.19306	Bactrocera musae	0.19306	Bactrocera jarvisi	0.28959	Bactrocera arecae	0.20434	Ceratitis capitata	0.36728	Bactrocera correcta	0.20434	Ceratitis capitata	0.19306	Bactrocera occipitalis	0.15888	Acanthiophilus helianthi	0.16369	Trirhithrum albomaculatum	0.20458	Bactrocera oleae	0.11568	Dacus lounsburyii	0.20783	Acanthiophilus helianthi	0.20378	Dacus telfaireae	0.075589	Ceratitis malgassa	0.17096	Ceratitis quinaria	0.30929	Anastrepha leptozona	0.27019	Anastrepha rheediae	0.28398	Anastrepha daciformis	0.37553	Anastrepha rheediae	0.2221	Anastrepha ornate	0.20075	Rhagoletis striatella	0.20075	Rhagoletis pomonella	0.20075	Rhagoletis pomonella	0.20075	Rhagoletis striatella
0.36728	Bactrocera correcta	0.19306	Bactrocera jarvisi	0.19306	Bactrocera bryoniae	0.28959	Monacrostichus citricola	0.19306	Bactrocera musae	0.34814	Adrama apicalis	0.19306	Bactrocera musae	0.19306	Dacus axanus	0.15601	Ceratitis discussa	0.11568	Ceratitis pedestris	0.20378	Dacus telfaireae	0.10189	Dacus africanus	0.20458	Bactrocera oleae	0.20378	Dacus arcuyatus	0.075589	Dacus demmerezi	0.16141	Dacus frontalis	0.30929	Anastrepha limae	0.2257	Anastrepha punctata	0.27517	Anastrepha bahiensis	0.3554	Anastrepha ludens	0.20121	Bactrocera oleae	0.20072	Anastrepha bistrigata	0.20075	Rhagoletis striatella	0.20075	Rhagoletis striatella	0.20075	Neotephritis finalis
0.34574	Bactrocera diversa	0.19306	Bactrocera bryoniae	0.19306	Bactrocera trivialis	0.25161	Bactrocera tuberculata	0.19306	Bactrocera jarvisi	0.34574	Bactrocera diversa	0.19306	Bactrocera jarvisi	0.19306	Dacus smieroides	0.13696	Bactrocera oleae	0.11568	Dacus lounsburyii	0.20378	Dacus arcuyatus	0.10189	Zacerata asparagi	0.20378	Dacus arcuyatus	0.16369	Trirhithrum albomaculatum	0.075589	Neoceratitis cyanescens	0.14669	Trirhithrum nigerrimum	0.2766	Anastrepha ludens	0.20936	Anastrepha ethalea	0.2221	Anastrepha ornate	0.32246	Anastrepha pseudoparallela	0.20075	Rhagoletis cingulata	0.20072	Anastrepha minensis	0.20075	Neotephritis finalis	0.20072	Anastrepha panamensis	0.20072	Anastrepha bistrigata
0.31113	Bactrocera scutellata	0.19306	Bactrocera trivialis	0.19306	Bactrocera munda	0.20434	Ceratitis capitata	0.19306	Bactrocera bryoniae	0.31113	Bactrocera scutellata	0.19306	Bactrocera bryoniae	0.19306	Callistomyia flavilavris	0.13177	Dacus arcuyatus	0.10626	Bactrocera latifrons	0.20378	Dacus humeralis	0.089039	Bactrocera zonata	0.20378	Dacus humeralis	0.11568	Ceratitis pedestris	0.075589	Trirhithromyia cyanescens	0.13855	Bactrocera oleae	0.27019	Anastrepha rheediae	0.20833	Anastrepha bahiensis	0.20072	Anastrepha bistrigata	0.28398	Anastrepha daciformis	0.20075	Rhagoletis pomonella	0.20072	Anastrepha parishi	0.20072	Anastrepha panamensis	0.20072	Anastrepha parishi	0.20072	Anastrepha minensis
0.3066	Acanthiophilus helianthi	0.19306	Bactrocera occipitalis	0.19306	Bactrocera occipitalis	0.19306	Bactrocera munda	0.19306	Bactrocera trivialis	0.3066	Acanthiophilus helianthi	0.19306	Bactrocera trivialis	0.19306	Epochra Canadensis	0.13177	Dacus humeralis	0.10189	Dacus africanus	0.16369	Trirhithrum albomaculatum	0.075589	Ceratitis malgassa	0.16369	Trirhithrum albomaculatum	0.11568	Dacus lounsburyii	0.062626	Carpomya vesuviana	0.13614	Acanthiophilus helianthi	0.2257	Anastrepha ornate	0.1866	Rhagoletis ferruginea	0.20072	Anastrepha minensis	0.27517	Anastrepha bahiensis	0.20075	Rhagoletis striatella	0.20072	Anastrepha perdita	0.20072	Anastrepha parishi	0.20072	Rhagoletis boycei	0.20072	Anastrepha panamensis
0.30557	Carpomya vesuviana	0.19306	Dacus axanus	0.19306	Dacus axanus	0.19306	Bactrocera minax	0.19306	Bactrocera munda	0.30557	Carpomya vesuviana	0.19306	Bactrocera munda	0.17662	Bactrocera tsuneonis	0.12274	Bactrocera latifrons	0.10189	Dacus vansomereni	0.11568	Ceratitis pedestris	0.075589	Dacus demmerezi	0.11568	Ceratitis pedestris	0.10626	Bactrocera latifrons	0.061799	Ceratitis catoirii	0.13196	Dacus telfaireae	0.20833	Anastrepha bahiensis	0.18557	Anastrepha sagittata	0.20072	Anastrepha panamensis	0.2221	Anastrepha ornate	0.20072	Anastrepha bistrigata	0.20072	Rhagoletis boycei	0.20072	Rhagoletis boycei	0.20072	Rhagoletis juglandis	0.20072	Anastrepha perdita
0.28959	Bactrocera arecae	0.19306	Dacus smieroides	0.19306	Dacus smieroides	0.19306	Bactrocera occipitalis	0.19306	Bactrocera minax	0.28959	Bactrocera arecae	0.19306	Bactrocera minax	0.16385	Dacus ciliatus	0.090123	Ceratitis pedestris	0.10189	Zacerata asparagi	0.11568	Dacus lounsburyii	0.075589	Neoceratitis cyanescens	0.11568	Dacus lounsburyii	0.10189	Dacus africanus	0.012489	Anastrepha fraterculus	0.13196	Dacus arcuyatus	0.18557	Anastrepha sagittata	0.16385	Anastrepha consobrina	0.20072	Anastrepha parishi	0.20072	Anastrepha bistrigata	0.20072	Anastrepha minensis	0.20072	Rhagoletis juglandis	0.20072	Rhagoletis juglandis	0.18839	Anastrepha ethalea	0.18839	Anastrepha ethalea
0.28959	Monacrostichus citricola	0.19306	Callistomyia flavilavris	0.19306	Callistomyia flavilavris	0.19306	Epochra Canadensis	0.19306	Dacus axanus	0.25161	Bactrocera tuberculata	0.19306	Dacus axanus	0.12383	Bactrocera invadens	0.090123	Dacus lounsburyii	0.089039	Bactrocera zonata	0.10626	Bactrocera latifrons	0.075589	Trirhithromyia cyanescens	0.10626	Bactrocera latifrons	0.10189	Dacus vansomereni	0.0081964	Anastrepha grandis	0.13196	Dacus humeralis	0.12988	Bactrocera oleae	0.14647	Anastrepha pallens	0.20072	Anastrepha perdita	0.20072	Anastrepha minensis	0.20072	Anastrepha perdita	0.18839	Anastrepha ethalea	0.16123	Anastrepha pallidipennis	0.18362	Anastrepha punctata	0.18362	Anastrepha punctata
0.25161	Bactrocera tuberculata	0.19306	Epochra Canadensis	0.19306	Epochra Canadensis	0.17662	Bactrocera tsuneonis	0.17662	Bactrocera tsuneonis	0.20434	Ceratitis capitata	0.19306	Dacus smieroides	0.11807	Bactrocera depressa	0.090123	Trirhithrum albomaculatum	0.075589	Ceratitis malgassa	0.10189	Dacus africanus	0.062626	Carpomya vesuviana	0.10189	Dacus africanus	0.10189	Zacerata asparagi	0.0080432	Anastrepha macrura	0.12107	Anastrepha fraterculus	0.12388	Rhagoletis cingulata	0.12988	Bactrocera oleae	0.18839	Anastrepha ethalea	0.20072	Anastrepha panamensis	0.20072	Rhagoletis boycei	0.18362	Anastrepha punctata	0.10162	Anastrepha ocresia	0.16426	Rhagoletis ferruginea	0.16426	Rhagoletis ferruginea
0.19306	Bactrocera munda	0.16385	Dacus ciliatus	0.17662	Bactrocera tsuneonis	0.16385	Dacus ciliatus	0.16385	Dacus ciliatus	0.19306	Bactrocera musae	0.17662	Bactrocera tsuneonis	0.11807	Bactrocera caryeae	0.065885	Dacus africanus	0.075589	Dacus demmerezi	0.10189	Dacus vansomereni	0.061799	Ceratitis catoirii	0.10189	Dacus vansomereni	0.089039	Bactrocera zonata	0.007669	Anastrepha chiclayae	0.090255	Ceratitis pedestris	0.12387	Rhagoletis pomonella	0.12388	Rhagoletis cingulata	0.18362	Anastrepha punctata	0.20072	Anastrepha parishi	0.20072	Rhagoletis juglandis	0.16426	Rhagoletis ferruginea	0.10162	Anastrepha suspensa	0.16123	Anastrepha consobrina	0.16123	Anastrepha consobrina
0.19306	Bactrocera minax	0.12383	Bactrocera invadens	0.11807	Bactrocera depressa	0.12383	Bactrocera invadens	0.12383	Bactrocera invadens	0.19306	Bactrocera jarvisi	0.16385	Dacus ciliatus	0.11807	Adrama austeni	0.065885	Dacus vansomereni	0.075589	Neoceratitis cyanescens	0.089039	Bactrocera zonata	0.013789	Trirhithrum manganum	0.10189	Zacerata asparagi	0.075589	Ceratitis malgassa	0.0066588	Anastrepha pseudoparallela	0.090255	Dacus lounsburyii	0.12387	Rhagoletis striatella	0.12387	Rhagoletis pomonella	0.16426	Rhagoletis ferruginea	0.20072	Anastrepha perdita	0.18839	Anastrepha ethalea	0.16123	Anastrepha consobrina	0.10149	Bactrocera cucurbitae	0.16123	Anastrepha pallidipennis	0.16123	Anastrepha pallidipennis
0.19306	Bactrocera occipitalis	0.11807	Bactrocera caryeae	0.096532	Bactrocera aquilonis	0.11807	Bactrocera depressa	0.11807	Bactrocera depressa	0.19306	Bactrocera bryoniae	0.12383	Bactrocera invadens	0.11446	Bactrocera oleae	0.065885	Zacerata asparagi	0.075589	Trirhithromyia cyanescens	0.075589	Ceratitis malgassa	0.012489	Anastrepha fraterculus	0.089039	Bactrocera zonata	0.075589	Dacus demmerezi	0.0064062	Rhagoletis ferruginea	0.076409	Anastrepha grandis	0.12387	Neotephritis finalis	0.12387	Rhagoletis striatella	0.16123	Anastrepha consobrina	0.18839	Anastrepha ethalea	0.18362	Anastrepha punctata	0.10162	Anastrepha ocresia	0.10061	Bactrocera latifrons	0.10162	Anastrepha ocresia	0.10162	Anastrepha ocresia
0.19306	Dacus smieroides	0.11807	Adrama austeni	0.096532	Bactrocera cacuminata	0.11807	Bactrocera caryeae	0.11807	Bactrocera caryeae	0.19306	Bactrocera trivialis	0.11807	Bactrocera depressa	0.11389	Carpomya pardalina	0.064999	Bactrocera dorsalis	0.062626	Carpomya vesuviana	0.075589	Dacus demmerezi	0.0081964	Anastrepha grandis	0.075589	Ceratitis malgassa	0.075589	Neoceratitis cyanescens	0.0061004	Anastrepha obliqua	0.073124	Anastrepha macrura	0.12372	Anastrepha bistrigata	0.12387	Neotephritis finalis	0.16123	Anastrepha pallidipennis	0.18362	Anastrepha punctata	0.16426	Rhagoletis ferruginea	0.10162	Anastrepha suspensa	0.10051	Rhagoletis tomatis	0.10162	Anastrepha suspensa	0.10162	Anastrepha suspensa
0.19306	Callistomyia flavilavris	0.11446	Bactrocera oleae	0.096532	Bactrocera halfordiae	0.11807	Adrama austeni	0.11807	Adrama austeni	0.19306	Bactrocera minax	0.11807	Bactrocera caryeae	0.096532	Bactrocera aquilonis	0.05515	Bactrocera correcta	0.061799	Ceratitis catoirii	0.075589	Neoceratitis cyanescens	0.0080432	Anastrepha macrura	0.075589	Dacus demmerezi	0.075589	Trirhithromyia cyanescens	0.0051346	Anastrepha serpentina	0.069945	Anastrepha obliqua	0.12372	Anastrepha minensis	0.12372	Anastrepha bistrigata	0.10162	Anastrepha ocresia	0.16426	Rhagoletis ferruginea	0.16123	Anastrepha consobrina	0.10149	Bactrocera cucurbitae	0.10039	Rhagoletis basiola	0.10149	Bactrocera cucurbitae	0.10149	Bactrocera cucurbitae
0.19306	Epochra Canadensis	0.11389	Carpomya pardalina	0.096532	Bactrocera mayi	0.11446	Bactrocera oleae	0.11446	Bactrocera oleae	0.19306	Dacus axanus	0.11446	Bactrocera oleae	0.096532	Bactrocera cacuminata	0.040943	Bactrocera tau	0.013789	Trirhithrum manganum	0.075589	Trirhithromyia cyanescens	0.007669	Anastrepha chiclayae	0.075589	Neoceratitis cyanescens	0.062626	Carpomya vesuviana	0.0051196	Anastrepha sororcula	0.069662	Bactrocera latifrons	0.12372	Anastrepha pallidipennis	0.12372	Anastrepha minensis	0.10162	Anastrepha suspensa	0.16123	Anastrepha consobrina	0.16123	Anastrepha pallidipennis	0.10061	Bactrocera latifrons	0.10039	Rhagoletis fausta	0.10061	Bactrocera latifrons	0.10061	Bactrocera latifrons
0.17662	Bactrocera tsuneonis	0.096532	Bactrocera aquilonis	0.096532	Bactrocera opiliae	0.11389	Carpomya pardalina	0.11389	Carpomya pardalina	0.19306	Dacus smieroides	0.11389	Carpomya pardalina	0.096532	Bactrocera halfordiae	0.040449	Bactrocera diversa	0.012489	Anastrepha fraterculus	0.062626	Carpomya vesuviana	0.0066588	Anastrepha pseudoparallela	0.075589	Trirhithromyia cyanescens	0.061799	Ceratitis catoirii	0.0050321	Anastrepha distincta	0.068257	Anastrepha chiclayae	0.12372	Anastrepha panamensis	0.12372	Anastrepha pallidipennis	0.10149	Bactrocera cucurbitae	0.16123	Anastrepha pallidipennis	0.10162	Anastrepha ocresia	0.10051	Rhagoletis tomatis	0.10039	Rhagoletis indifferens	0.10039	Rhagoletis basiola	0.10051	Rhagoletis tomatis
0.16385	Dacus ciliatus	0.096532	Bactrocera cacuminata	0.096532	Bactrocera nigra	0.096532	Bactrocera aquilonis	0.096532	Bactrocera aquilonis	0.19306	Callistomyia flavilavris	0.096532	Bactrocera aquilonis	0.096532	Bactrocera mayi	0.034382	Bactrocera caudata	0.0081964	Anastrepha grandis	0.061799	Ceratitis catoirii	0.0064062	Rhagoletis ferruginea	0.062626	Carpomya vesuviana	0.013789	Trirhithrum manganum	0.004999	Bactrocera dorsalis	0.065981	Dacus africanus	0.12372	Anastrepha parishi	0.12372	Anastrepha panamensis	0.10061	Bactrocera latifrons	0.10051	Rhagoletis tomatis	0.10162	Anastrepha suspensa	0.10039	Rhagoletis basiola	0.10039	Rhagoletis mendax	0.10039	Rhagoletis fausta	0.10039	Rhagoletis basiola
0.12383	Bactrocera invadens	0.096532	Bactrocera halfordiae	0.096532	Bactrocera cucumis	0.096532	Bactrocera cacuminata	0.096532	Bactrocera cacuminata	0.17662	Bactrocera tsuneonis	0.096532	Bactrocera cacuminata	0.096532	Bactrocera opiliae	0.024542	Bactrocera scutellata	0.0080432	Anastrepha macrura	0.013789	Trirhithrum manganum	0.0061004	Anastrepha obliqua	0.061799	Ceratitis catoirii	0.012489	Anastrepha fraterculus	0.0049163	Anastrepha striata	0.065981	Dacus vansomereni	0.12372	Anastrepha perdita	0.12372	Anastrepha parishi	0.10051	Rhagoletis tomatis	0.10036	Anastrepha margarita	0.10149	Bactrocera cucurbitae	0.10039	Rhagoletis fausta	0.10039	Rhagoletis ribicola	0.10039	Rhagoletis indifferens	0.10039	Rhagoletis fausta
0.11807	Bactrocera depressa	0.096532	Bactrocera mayi	0.096532	Bactrocera frauenfeldi	0.096532	Bactrocera halfordiae	0.096532	Bactrocera halfordiae	0.16385	Dacus ciliatus	0.096532	Bactrocera nigra	0.096532	Bactrocera versicolor	0.021261	Bactrocera tsuneonis	0.007669	Anastrepha chiclayae	0.012489	Anastrepha fraterculus	0.0058773	Anastrepha montei	0.013789	Trirhithrum manganum	0.0081964	Anastrepha grandis	0.0047138	Anastrepha daciformis	0.065981	Zacerata asparagi	0.12372	Rhagoletis boycei	0.12372	Anastrepha perdita	0.10039	Rhagoletis basiola	0.10036	Anastrepha passiflorae	0.10061	Bactrocera latifrons	0.10039	Rhagoletis indifferens	0.10039	Rhagoletis tabellaria	0.10039	Rhagoletis mendax	0.10039	Rhagoletis indifferens
0.11807	Bactrocera caryeae	0.096532	Bactrocera opiliae	0.096532	Bactrocera jarvisi	0.096532	Bactrocera mayi	0.096532	Bactrocera mayi	0.12383	Bactrocera invadens	0.096532	Bactrocera cucumis	0.096532	Bactrocera nigra	0.019681	Bactrocera albistrigata	0.0066588	Anastrepha pseudoparallela	0.0081964	Anastrepha grandis	0.0051346	Anastrepha serpentina	0.012489	Anastrepha fraterculus	0.0080432	Anastrepha macrura	0.0044613	Anastrepha punctata	0.061991	Anastrepha montei	0.12372	Rhagoletis juglandis	0.12372	Rhagoletis boycei	0.10039	Rhagoletis fausta	0.10036	Anastrepha steyskali	0.10051	Rhagoletis tomatis	0.10039	Rhagoletis mendax	0.10039	Euphranta canadensis	0.10039	Rhagoletis ribicola	0.10039	Rhagoletis mendax
0.11446	Bactrocera oleae	0.096532	Bactrocera versicolor	0.096532	Bactrocera neohumeralis	0.096532	Bactrocera opiliae	0.096532	Bactrocera opiliae	0.11807	Bactrocera depressa	0.096532	Bactrocera frauenfeldi	0.096532	Bactrocera duplicata	0.019681	Dacus longicornis	0.0064062	Rhagoletis ferruginea	0.0080432	Anastrepha macrura	0.0051196	Anastrepha sororcula	0.0081964	Anastrepha grandis	0.007669	Anastrepha chiclayae	0.0041876	Bactrocera correcta	0.055387	Anastrepha serpentina	0.079966	Bactrocera cucurbitae	0.12372	Rhagoletis juglandis	0.10039	Rhagoletis indifferens	0.10036	Rhagoletis lycopersella	0.10039	Rhagoletis basiola	0.10039	Rhagoletis ribicola	0.10039	Gymnocarena diffusa	0.10039	Rhagoletis tabellaria	0.10039	Rhagoletis ribicola
0.11389	Carpomya pardalina	0.096532	Bactrocera nigra	0.096532	Bactrocera philippinensis	0.096532	Bactrocera versicolor	0.096532	Bactrocera versicolor	0.11807	Bactrocera caryeae	0.096532	Bactrocera jarvisi	0.096532	Bactrocera cucumis	0.017981	Bactrocera depressa	0.0061004	Anastrepha obliqua	0.007669	Anastrepha chiclayae	0.0050321	Anastrepha distincta	0.0080432	Anastrepha macrura	0.0066588	Anastrepha pseudoparallela	0.0034826	Anastrepha ornate	0.055116	Anastrepha pseudoparallela	0.066071	Anastrepha ocresia	0.10199	Anastrepha mburucuyae	0.10039	Rhagoletis mendax	0.10036	Rhagoletis nova	0.10039	Rhagoletis fausta	0.10039	Rhagoletis tabellaria	0.10039	Paracantha cultaris	0.10039	Euphranta canadensis	0.10039	Rhagoletis tabellaria
0.096532	Bactrocera versicolor	0.096532	Bactrocera duplicata	0.096532	Bactrocera tryoni	0.096532	Bactrocera nigra	0.096532	Bactrocera nigra	0.11807	Adrama austeni	0.096532	Bactrocera neohumeralis	0.096532	Bactrocera frauenfeldi	0.017981	Bactrocera caryeae	0.0058773	Anastrepha montei	0.0066588	Anastrepha pseudoparallela	0.004999	Bactrocera dorsalis	0.007669	Anastrepha chiclayae	0.0064062	Rhagoletis ferruginea	0.0033977	Anastrepha ethalea	0.053311	Anastrepha striata	0.066071	Anastrepha suspensa	0.10199	Anastrepha schultzi	0.10039	Rhagoletis ribicola	0.10036	Rhagoletis psalida	0.10039	Rhagoletis indifferens	0.10039	Euphranta canadensis	0.10039	Strauzia longipennis	0.10039	Zonosemata electa	0.10039	Euphranta canadensis
0.096532	Bactrocera duplicata	0.096532	Bactrocera cucumis	0.096532	Bactrocera melas	0.096532	Bactrocera duplicata	0.096532	Bactrocera duplicata	0.11446	Bactrocera oleae	0.096532	Bactrocera philippinensis	0.096532	Bactrocera jarvisi	0.017981	Adrama austeni	0.0051346	Anastrepha serpentina	0.0064062	Rhagoletis ferruginea	0.0049163	Anastrepha striata	0.0066588	Anastrepha pseudoparallela	0.0061004	Anastrepha obliqua	0.0033294	Anastrepha consobrina	0.052136	Anastrepha sororcula	0.064938	Bactrocera latifrons	0.10199	Anastrepha turicai	0.10039	Rhagoletis tabellaria	0.10036	Rhagoletis ramosae	0.10039	Rhagoletis mendax	0.10039	Zonosemata electa	0.10039	Zonosemata electa	0.10037	Bactrocera zonata	0.10039	Gymnocarena diffusa
0.096532	Bactrocera philippinensis	0.096532	Bactrocera frauenfeldi	0.096532	Bactrocera mutabilis	0.096532	Bactrocera cucumis	0.096532	Bactrocera cucumis	0.11389	Carpomya pardalina	0.096532	Bactrocera tryoni	0.096532	Bactrocera neohumeralis	0.016401	Bactrocera carambolae	0.0051196	Anastrepha sororcula	0.0061004	Anastrepha obliqua	0.0047138	Anastrepha daciformis	0.0064062	Rhagoletis ferruginea	0.0058773	Anastrepha montei	0.0033294	Rhagoletis tomatis	0.051831	Rhagoletis ferruginea	0.064938	Rhagoletis tomatis	0.10199	Anastrepha zuelaniae	0.10039	Euphranta canadensis	0.10036	Rhagoletis zoqui	0.10039	Rhagoletis ribicola	0.10037	Bactrocera zonata	0.10037	Bactrocera zonata	0.10036	Anastrepha margarita	0.10039	Paracantha cultaris
0.096532	Bactrocera trimaculata	0.096532	Bactrocera jarvisi	0.096532	Bactrocera trimaculata	0.096532	Bactrocera frauenfeldi	0.096532	Bactrocera frauenfeldi	0.096532	Bactrocera aquilonis	0.096532	Bactrocera melas	0.096532	Bactrocera philippinensis	0.016401	Bactrocera umbrosa	0.0050321	Anastrepha distincta	0.0058773	Anastrepha montei	0.0044928	Anastrepha manihoti	0.0061004	Anastrepha obliqua	0.0051346	Anastrepha serpentina	0.0030768	Anastrepha mburucuyae	0.051762	Anastrepha distincta	0.063909	Bactrocera invadens	0.079966	Bactrocera cucurbitae	0.10039	Gymnocarena diffusa	0.060871	Anastrepha manizaliensis	0.10039	Rhagoletis tabellaria	0.10036	Anastrepha margarita	0.10036	Anastrepha margarita	0.10036	Anastrepha nigrifascia	0.10039	Strauzia longipennis
0.096532	Dacus eumenoides	0.096532	Bactrocera neohumeralis	0.096532	Dacus petioliformus	0.096532	Bactrocera jarvisi	0.096532	Bactrocera jarvisi	0.096532	Bactrocera cacuminata	0.096532	Dirioxa confusa	0.096532	Bactrocera tryoni	0.014701	Bactrocera kandiensis	0.004999	Bactrocera dorsalis	0.0051346	Anastrepha serpentina	0.0044613	Anastrepha punctata	0.0058773	Anastrepha montei	0.0051196	Anastrepha sororcula	0.0030768	Anastrepha schultzi	0.048546	Ceratitis malgassa	0.062265	Bactrocera zonata	0.066071	Anastrepha ocresia	0.10039	Paracantha cultaris	0.060871	Anastrepha mburucuyae	0.10039	Euphranta canadensis	0.10036	Anastrepha nigrifascia	0.10036	Anastrepha nigrifascia	0.10036	Anastrepha passiflorae	0.10039	Zonosemata electa
0.096532	Monacrostichus malaysiae	0.096532	Bactrocera philippinensis	0.096532	Dacus eumenoides	0.096532	Bactrocera neohumeralis	0.096532	Bactrocera neohumeralis	0.096532	Bactrocera halfordiae	0.096532	Dirioxa pornia	0.096532	Bactrocera melas	0.014701	Euphranta japonica	0.0049163	Anastrepha striata	0.0051196	Anastrepha sororcula	0.0043738	Anastrepha pickeli	0.0051346	Anastrepha serpentina	0.0050321	Anastrepha distincta	0.0030768	Anastrepha turicai	0.048546	Dacus demmerezi	0.062011	Rhagoletis basiola	0.066071	Anastrepha suspensa	0.10039	Strauzia longipennis	0.060871	Anastrepha schultzi	0.10039	Zonosemata electa	0.10036	Anastrepha steyskali	0.10036	Anastrepha passiflorae	0.10036	Bactrocera dorsalis	0.10037	Bactrocera zonata
0.021539	Bactrocera kandiensis	0.096532	Bactrocera tryoni	0.096532	Dacus aequalis	0.096532	Bactrocera philippinensis	0.096532	Bactrocera philippinensis	0.096532	Bactrocera mayi	0.021539	Bactrocera kandiensis	0.096532	Bactrocera mutabilis	0.013121	Bactrocera pedestris	0.0047138	Anastrepha daciformis	0.0050321	Anastrepha distincta	0.0041876	Bactrocera correcta	0.0051196	Anastrepha sororcula	0.004999	Bactrocera dorsalis	0.0030768	Anastrepha zuelaniae	0.048546	Neoceratitis cyanescens	0.062011	Rhagoletis fausta	0.064938	Bactrocera latifrons	0.10039	Zonosemata electa	0.060871	Anastrepha turicai	0.10037	Bactrocera zonata	0.10036	Bactrocera dorsalis	0.10036	Anastrepha steyskali	0.10036	Rhagoletis completa	0.10036	Anastrepha nigrifascia
0.021539	Euphranta camelliae	0.096532	Bactrocera melas	0.096532	Dirioxa confusa	0.096532	Bactrocera tryoni	0.096532	Bactrocera tryoni	0.096532	Bactrocera opiliae	0.013064	Rhagoletis pomonella	0.096532	Bactrocera trimaculata	0.013121	Bactrocera papayae	0.0044928	Anastrepha manihoti	0.004999	Bactrocera dorsalis	0.0034826	Anastrepha ornate	0.0050321	Anastrepha distincta	0.0049163	Anastrepha striata	0.0030768	Rhagoletis conversa	0.048546	Trirhithromyia cyanescens	0.062011	Rhagoletis indifferens	0.064938	Rhagoletis tomatis	0.10037	Bactrocera zonata	0.060871	Anastrepha zuelaniae	0.10036	Anastrepha margarita	0.10036	Rhagoletis completa	0.10036	Bactrocera dorsalis	0.10036	Rhagoletis ramosae	0.10036	Anastrepha passiflorae
0.021539	Euphranta japonica	0.096532	Bactrocera mutabilis	0.096532	Dirioxa pornia	0.096532	Bactrocera melas	0.096532	Bactrocera melas	0.096532	Bactrocera versicolor	0.0051838	Dacus punctatifrons	0.096532	Dacus petioliformus	0.013121	Adrama apicalis	0.0044613	Anastrepha punctata	0.0049163	Anastrepha striata	0.0033977	Anastrepha ethalea	0.004999	Bactrocera dorsalis	0.0047138	Anastrepha daciformis	0.0030557	Bactrocera diversa	0.045566	Anastrepha daciformis	0.062011	Rhagoletis mendax	0.063909	Bactrocera invadens	0.10036	Anastrepha margarita	0.0059207	Bactrocera invadens	0.10036	Anastrepha nigrifascia	0.10036	Rhagoletis lycopersella	0.10036	Rhagoletis completa	0.10036	Rhagoletis suavis	0.10036	Anastrepha steyskali
0.01521	Capparimyia savastani	0.096532	Bactrocera trimaculata	0.096532	Monacrostichus malaysiae	0.096532	Bactrocera mutabilis	0.096532	Bactrocera mutabilis	0.096532	Bactrocera nigra	0.0040568	Ceratitis rosa	0.096532	Dacus aequalis	0.013121	Adrama determinata	0.0043738	Anastrepha pickeli	0.0047138	Anastrepha daciformis	0.0033294	Anastrepha consobrina	0.0049163	Anastrepha striata	0.0044928	Anastrepha manihoti	0.0029536	Bactrocera tau	0.043983	Anastrepha manihoti	0.062011	Rhagoletis ribicola	0.062265	Bactrocera zonata	0.10036	Anastrepha nigrifascia	0.005792	Ceratitis cosyra	0.10036	Anastrepha passiflorae	0.10036	Rhagoletis nova	0.10036	Rhagoletis lycopersella	0.10036	Rhagoletis zoqui	0.10036	Bactrocera dorsalis
0.013064	Rhagoletis pomonella	0.096532	Dacus petioliformus	0.021539	Bactrocera kandiensis	0.096532	Bactrocera trimaculata	0.096532	Bactrocera trimaculata	0.096532	Bactrocera duplicata	0.0037284	Dacus frontalis	0.096532	Dirioxa confusa	0.013121	Euphranta lemniscata	0.0041876	Bactrocera correcta	0.0044928	Anastrepha manihoti	0.0033294	Rhagoletis tomatis	0.0047138	Anastrepha daciformis	0.0044613	Anastrepha punctata	0.0025479	Bactrocera caudata	0.042809	Bactrocera zonata	0.062011	Rhagoletis tabellaria	0.062011	Rhagoletis basiola	0.10036	Anastrepha passiflorae	0.0048383	Dacus ciliatus	0.10036	Anastrepha steyskali	0.10036	Rhagoletis psalida	0.10036	Rhagoletis nova	0.060871	Anastrepha manizaliensis	0.10036	Rhagoletis lycopersella
0.0051838	Dacus punctatifrons	0.096532	Dacus eumenoides	0.021539	Euphranta camelliae	0.096532	Dacus petioliformus	0.096532	Dacus petioliformus	0.096532	Bactrocera cucumis	0.0035186	Dacus vertebratus	0.096532	Dirioxa pornia	0.0098407	Bactrocera arecae	0.0034826	Anastrepha ornate	0.0044613	Anastrepha punctata	0.0030768	Anastrepha mburucuyae	0.0044928	Anastrepha manihoti	0.0043738	Anastrepha pickeli	0.0018896	Bactrocera scutellata	0.042281	Anastrepha punctata	0.062011	Euphranta canadensis	0.062011	Rhagoletis fausta	0.10036	Anastrepha steyskali	0.0042744	Dacus bivittatus	0.10036	Bactrocera dorsalis	0.10036	Rhagoletis ramosae	0.10036	Rhagoletis psalida	0.060871	Anastrepha mburucuyae	0.10036	Rhagoletis nova
0.0040568	Ceratitis rosa	0.096532	Dacus aequalis	0.021539	Euphranta japonica	0.096532	Dacus eumenoides	0.096532	Dacus eumenoides	0.096532	Bactrocera frauenfeldi	0.0029474	Ceratitis malgassa	0.096532	Monacrostichus malaysiae	0.0098407	Bactrocera tuberculata	0.0033977	Anastrepha ethalea	0.0043738	Anastrepha pickeli	0.0030768	Anastrepha schultzi	0.0044613	Anastrepha punctata	0.0041876	Bactrocera correcta	0.0015376	Bactrocera tsuneonis	0.041907	Anastrepha pickeli	0.062011	Gymnocarena diffusa	0.062011	Rhagoletis indifferens	0.10036	Bactrocera dorsalis	0.004184	Ceratitis rosa	0.10036	Rhagoletis completa	0.10036	Rhagoletis suavis	0.10036	Rhagoletis ramosae	0.060871	Anastrepha schultzi	0.10036	Rhagoletis psalida
0.0037284	Dacus frontalis	0.096532	Dirioxa confusa	0.01521	Capparimyia savastani	0.096532	Dacus aequalis	0.096532	Dacus aequalis	0.096532	Bactrocera jarvisi	0.0029474	Dacus demmerezi	0.021539	Bactrocera kandiensis	0.0098407	Monacrostichus citricola	0.0033294	Anastrepha consobrina	0.0041876	Bactrocera correcta	0.0030768	Anastrepha turicai	0.0043738	Anastrepha pickeli	0.0034826	Anastrepha ornate	0.0015154	Anastrepha bezzii	0.030843	Anastrepha ornate	0.062011	Paracantha cultaris	0.062011	Rhagoletis mendax	0.10036	Rhagoletis completa	0.0035281	Ceratitis discussa	0.10036	Rhagoletis lycopersella	0.10036	Rhagoletis zoqui	0.10036	Rhagoletis suavis	0.060871	Anastrepha turicai	0.10036	Rhagoletis suavis
0.0035186	Dacus vertebratus	0.096532	Dirioxa pornia	0.013064	Rhagoletis pomonella	0.096532	Dirioxa confusa	0.096532	Dirioxa confusa	0.096532	Bactrocera neohumeralis	0.0029474	Neoceratitis cyanescens	0.021539	Euphranta camelliae	0.0065604	Bactrocera musae	0.0033294	Rhagoletis tomatis	0.0034826	Anastrepha ornate	0.0030768	Anastrepha zuelaniae	0.0041876	Bactrocera correcta	0.0033977	Anastrepha ethalea	0.0015154	Bactrocera albistrigata	0.029975	Anastrepha ethalea	0.062011	Strauzia longipennis	0.062011	Rhagoletis ribicola	0.10036	Rhagoletis lycopersella	0.0032793	Trirhithrum albomaculatum	0.10036	Rhagoletis nova	0.060871	Anastrepha manizaliensis	0.10036	Rhagoletis zoqui	0.060871	Anastrepha zuelaniae	0.060871	Anastrepha manizaliensis
0.0029474	Ceratitis malgassa	0.096532	Monacrostichus malaysiae	0.0051838	Dacus punctatifrons	0.096532	Dirioxa pornia	0.096532	Dirioxa pornia	0.096532	Bactrocera tryoni	0.0029474	Trirhithromyia cyanescens	0.021539	Euphranta japonica	0.0065604	Bactrocera jarvisi	0.0030768	Anastrepha mburucuyae	0.0033977	Anastrepha ethalea	0.0030768	Rhagoletis conversa	0.0034826	Anastrepha ornate	0.0033294	Anastrepha consobrina	0.001416	Dacus longicornis	0.027558	Anastrepha consobrina	0.062011	Zonosemata electa	0.062011	Rhagoletis tabellaria	0.10036	Rhagoletis nova	0.0022608	Ceratitis punctata	0.10036	Rhagoletis psalida	0.060871	Anastrepha mburucuyae	0.060871	Anastrepha manizaliensis	0.0059207	Bactrocera invadens	0.060871	Anastrepha mburucuyae
0.0029474	Dacus demmerezi	0.021539	Bactrocera kandiensis	0.0040568	Ceratitis rosa	0.096532	Monacrostichus malaysiae	0.021539	Bactrocera kandiensis	0.096532	Bactrocera melas	0.002915	Ceratitis catoirii	0.01521	Capparimyia savastani	0.0065604	Bactrocera bryoniae	0.0030768	Anastrepha schultzi	0.0033294	Anastrepha consobrina	0.0030557	Bactrocera diversa	0.0033977	Anastrepha ethalea	0.0033294	Rhagoletis tomatis	0.0013845	Bactrocera depressa	0.024465	Carpomya vesuviana	0.061858	Anastrepha manizaliensis	0.062011	Euphranta canadensis	0.10036	Rhagoletis psalida	0.0020121	Ceratitis anonae	0.10036	Rhagoletis ramosae	0.060871	Anastrepha schultzi	0.060871	Anastrepha mburucuyae	0.005792	Ceratitis cosyra	0.060871	Anastrepha schultzi
0.0029474	Neoceratitis cyanescens	0.021539	Euphranta camelliae	0.0037284	Dacus frontalis	0.021539	Bactrocera kandiensis	0.021539	Euphranta camelliae	0.096532	Bactrocera mutabilis	0.0016261	Ceratitis cosyra	0.013064	Rhagoletis pomonella	0.0065604	Bactrocera trivialis	0.0030768	Anastrepha turicai	0.0033294	Rhagoletis tomatis	0.0029536	Bactrocera tau	0.0033294	Anastrepha consobrina	0.0030768	Anastrepha mburucuyae	0.0013845	Bactrocera caryeae	0.024273	Anastrepha mburucuyae	0.061858	Anastrepha margarita	0.062011	Gymnocarena diffusa	0.10036	Rhagoletis suavis	0.0012806	Dacus vertebratus	0.10036	Rhagoletis suavis	0.060871	Anastrepha turicai	0.060871	Anastrepha schultzi	0.0048383	Dacus ciliatus	0.060871	Anastrepha turicai
0.0029474	Trirhithromyia cyanescens	0.021539	Euphranta japonica	0.0035186	Dacus vertebratus	0.021539	Euphranta camelliae	0.021539	Euphranta japonica	0.096532	Dacus petioliformus	0.0016157	Ceratitis quinaria	0.0051838	Dacus punctatifrons	0.0065604	Bactrocera munda	0.0030768	Anastrepha zuelaniae	0.0030768	Anastrepha mburucuyae	0.0025479	Bactrocera caudata	0.0033294	Rhagoletis tomatis	0.0030768	Anastrepha schultzi	0.0013845	Adrama austeni	0.024273	Anastrepha schultzi	0.061858	Anastrepha nigrifascia	0.062011	Paracantha cultaris	0.060871	Anastrepha manizaliensis	0.0012541	Dacus punctatifrons	0.10036	Rhagoletis zoqui	0.060871	Anastrepha zuelaniae	0.060871	Anastrepha turicai	0.0042744	Dacus bivittatus	0.060871	Anastrepha zuelaniae
0.002915	Ceratitis catoirii	0.01521	Capparimyia savastani	0.0029474	Ceratitis malgassa	0.021539	Euphranta japonica	0.01521	Capparimyia savastani	0.096532	Dacus eumenoides	0.0012036	Dacus bivittatus	0.0040568	Ceratitis rosa	0.0065604	Bactrocera minax	0.0030768	Rhagoletis conversa	0.0030768	Anastrepha schultzi	0.0018896	Bactrocera scutellata	0.0030768	Anastrepha mburucuyae	0.0030768	Anastrepha turicai	0.0013371	Toxotrypana curvicauda	0.024273	Anastrepha turicai	0.061858	Anastrepha passiflorae	0.062011	Strauzia longipennis	0.060871	Anastrepha mburucuyae	0.00099506	Ceratitis rubivora	0.060871	Anastrepha manizaliensis	0.0059207	Bactrocera invadens	0.060871	Anastrepha zuelaniae	0.004184	Ceratitis rosa	0.0059207	Bactrocera invadens
0.0022096	Carpomya incompleta	0.013064	Rhagoletis pomonella	0.0029474	Dacus demmerezi	0.01521	Capparimyia savastani	0.013064	Rhagoletis pomonella	0.096532	Dacus aequalis	0.0011049	Ceratitis punctata	0.0037284	Dacus frontalis	0.0065604	Bactrocera occipitalis	0.0030557	Bactrocera diversa	0.0030768	Anastrepha turicai	0.0015376	Bactrocera tsuneonis	0.0030768	Anastrepha schultzi	0.0030768	Anastrepha zuelaniae	0.001297	Anastrepha antunesi	0.024273	Anastrepha zuelaniae	0.061858	Anastrepha steyskali	0.062011	Zonosemata electa	0.060871	Anastrepha schultzi	0.00099506	Dacus momordicae	0.060871	Anastrepha mburucuyae	0.005792	Ceratitis cosyra	0.0059207	Bactrocera invadens	0.0035281	Ceratitis discussa	0.005792	Ceratitis cosyra
0.0016261	Ceratitis cosyra	0.0051838	Dacus punctatifrons	0.0029474	Neoceratitis cyanescens	0.013064	Rhagoletis pomonella	0.0051838	Dacus punctatifrons	0.096532	Dirioxa confusa	0.0010728	Rhagoletis cerasi	0.0035186	Dacus vertebratus	0.0065604	Dacus axanus	0.0029536	Bactrocera tau	0.0030768	Anastrepha zuelaniae	0.0015154	Anastrepha bezzii	0.0030768	Anastrepha turicai	0.0030768	Rhagoletis conversa	0.0012628	Anastrepha leptozona	0.024273	Ceratitis catoirii	0.061858	Bactrocera dorsalis	0.061858	Anastrepha manizaliensis	0.060871	Anastrepha turicai	0.00074906	Trirhithrum nigrum	0.060871	Anastrepha schultzi	0.0048383	Dacus ciliatus	0.005792	Ceratitis cosyra	0.0032793	Trirhithrum albomaculatum	0.0048383	Dacus ciliatus
0.0016157	Ceratitis quinaria	0.0040568	Ceratitis rosa	0.0029474	Trirhithromyia cyanescens	0.0051838	Dacus punctatifrons	0.0040568	Ceratitis rosa	0.096532	Dirioxa pornia	0.00095711	Dacus momordicae	0.0029474	Ceratitis malgassa	0.0065604	Dacus smieroides	0.0025479	Bactrocera caudata	0.0030768	Rhagoletis conversa	0.0015154	Bactrocera albistrigata	0.0030768	Anastrepha zuelaniae	0.0030557	Bactrocera diversa	0.0012628	Anastrepha limae	0.024273	Trirhithrum manganum	0.061858	Rhagoletis completa	0.061858	Anastrepha margarita	0.060871	Anastrepha zuelaniae	0.00074629	Ceratitis colae	0.060871	Anastrepha turicai	0.0042744	Dacus bivittatus	0.0048383	Dacus ciliatus	0.0022608	Ceratitis punctata	0.0042744	Dacus bivittatus
0.0012036	Dacus bivittatus	0.0037284	Dacus frontalis	0.002915	Ceratitis catoirii	0.0040568	Ceratitis rosa	0.0037284	Dacus frontalis	0.096532	Monacrostichus malaysiae	0.00086562	Ceratitis anonae	0.0029474	Dacus demmerezi	0.0065604	Callistomyia flavilavris	0.0018896	Bactrocera scutellata	0.0030557	Bactrocera diversa	0.001416	Dacus longicornis	0.0030768	Rhagoletis conversa	0.0029536	Bactrocera tau	0.0012628	Bactrocera carambolae	0.022631	Toxotrypana curvicauda	0.061858	Rhagoletis lycopersella	0.061858	Anastrepha nigrifascia	0.0059207	Bactrocera invadens	0.00074629	Trirhithrum coffeae	0.060871	Anastrepha zuelaniae	0.004184	Ceratitis rosa	0.0042744	Dacus bivittatus	0.0020121	Ceratitis anonae	0.004184	Ceratitis rosa
0.0011049	Ceratitis punctata	0.0035186	Dacus vertebratus	0.0022096	Carpomya incompleta	0.0037284	Dacus frontalis	0.0035186	Dacus vertebratus	0.021539	Bactrocera kandiensis	0.00047856	Dacus arcuyatus	0.0029474	Neoceratitis cyanescens	0.0065604	Epochra Canadensis	0.0015376	Bactrocera tsuneonis	0.0029536	Bactrocera tau	0.0013845	Bactrocera depressa	0.0030557	Bactrocera diversa	0.0025479	Bactrocera caudata	0.0012628	Bactrocera umbrosa	0.01971	Anastrepha bezzii	0.061858	Rhagoletis nova	0.061858	Anastrepha passiflorae	0.005792	Ceratitis cosyra	0.00065118	Dacus frontalis	0.0059207	Bactrocera invadens	0.0035281	Ceratitis discussa	0.004184	Ceratitis rosa	0.0012806	Dacus vertebratus	0.0035281	Ceratitis discussa
0.0010728	Rhagoletis cerasi	0.0029474	Ceratitis malgassa	0.0017902	Trirhithrum nigrum	0.0035186	Dacus vertebratus	0.0029474	Ceratitis malgassa	0.021539	Euphranta camelliae	0.00047856	Dacus humeralis	0.0029474	Trirhithromyia cyanescens	0.0053103	Carpomya pardalina	0.0015154	Anastrepha bezzii	0.0025479	Bactrocera caudata	0.0013845	Bactrocera caryeae	0.0029536	Bactrocera tau	0.0018896	Bactrocera scutellata	0.0011319	Bactrocera kandiensis	0.018007	Rhagoletis tomatis	0.061858	Rhagoletis psalida	0.061858	Anastrepha steyskali	0.0048383	Dacus ciliatus	0.00053396	Ceratitis quinaria	0.005792	Ceratitis cosyra	0.0032793	Trirhithrum albomaculatum	0.0035281	Ceratitis discussa	0.0012541	Dacus punctatifrons	0.0032793	Trirhithrum albomaculatum
0.00095711	Ceratitis rubivora	0.0029474	Dacus demmerezi	0.0016261	Ceratitis cosyra	0.0029474	Ceratitis malgassa	0.0029474	Dacus demmerezi	0.021539	Euphranta japonica	0.00027166	Ceratitis pedestris	0.002915	Ceratitis catoirii	0.0032883	Rhagoletis tomatis	0.0015154	Bactrocera albistrigata	0.0018896	Bactrocera scutellata	0.0013845	Adrama austeni	0.0025479	Bactrocera caudata	0.0015376	Bactrocera tsuneonis	0.0011319	Euphranta camelliae	0.017634	Anastrepha antunesi	0.061858	Rhagoletis ramosae	0.061858	Bactrocera dorsalis	0.0042744	Dacus bivittatus	0.00050029	Trirhithrum nigerrimum	0.0048383	Dacus ciliatus	0.0022608	Ceratitis punctata	0.0032793	Trirhithrum albomaculatum	0.00099506	Ceratitis rubivora	0.0022608	Ceratitis punctata
0.00095711	Dacus momordicae	0.0029474	Neoceratitis cyanescens	0.0016157	Ceratitis quinaria	0.0029474	Dacus demmerezi	0.0029474	Neoceratitis cyanescens	0.01521	Capparimyia savastani	0.00027166	Dacus lounsburyii	0.0022096	Carpomya incompleta	0.0032802	Bactrocera aquilonis	0.001416	Dacus longicornis	0.0015376	Bactrocera tsuneonis	0.0013371	Toxotrypana curvicauda	0.0018896	Bactrocera scutellata	0.0015154	Anastrepha bezzii	0.0011319	Euphranta japonica	0.016425	Anastrepha leptozona	0.061858	Rhagoletis suavis	0.061858	Rhagoletis completa	0.004184	Ceratitis rosa	0.00049847	Acanthiophilus helianthi	0.0042744	Dacus bivittatus	0.0020121	Ceratitis anonae	0.0022608	Ceratitis punctata	0.00099506	Dacus momordicae	0.0020121	Ceratitis anonae
0.00086562	Ceratitis anonae	0.0029474	Trirhithromyia cyanescens	0.0015509	Trirhithrum nigerrimum	0.0029474	Neoceratitis cyanescens	0.0029474	Trirhithromyia cyanescens	0.013064	Rhagoletis pomonella	0.00023928	Dacus africanus	0.0017902	Trirhithrum nigrum	0.0032802	Bactrocera cacuminata	0.0013845	Bactrocera depressa	0.0015154	Anastrepha bezzii	0.001297	Anastrepha antunesi	0.0015376	Bactrocera tsuneonis	0.0015154	Bactrocera albistrigata	0.0010102	Bactrocera pedestris	0.016425	Anastrepha limae	0.061858	Rhagoletis zoqui	0.061858	Rhagoletis lycopersella	0.0035281	Ceratitis discussa	0.00049753	Dacus telfaireae	0.004184	Ceratitis rosa	0.0012806	Dacus vertebratus	0.0020121	Ceratitis anonae	0.00074906	Trirhithrum nigrum	0.0012806	Dacus vertebratus
0.00048578	Ceratitis discussa	0.002915	Ceratitis catoirii	0.0012036	Dacus bivittatus	0.0029474	Trirhithromyia cyanescens	0.002915	Ceratitis catoirii	0.0051838	Dacus punctatifrons	3.5974e-07	Rhagoletis conversa	0.0016261	Ceratitis cosyra	0.0032802	Bactrocera halfordiae	0.0013845	Bactrocera caryeae	0.0015154	Bactrocera albistrigata	0.0012628	Anastrepha leptozona	0.0015154	Anastrepha bezzii	0.001416	Dacus longicornis	0.0010102	Bactrocera papayae	0.014722	Rhagoletis conversa	0.061516	Ceratitis cosyra	0.061858	Rhagoletis nova	0.0032793	Trirhithrum albomaculatum	0.00049753	Dacus arcuyatus	0.0035281	Ceratitis discussa	0.0012541	Dacus punctatifrons	0.0012806	Dacus vertebratus	0.00074629	Ceratitis colae	0.0012541	Dacus punctatifrons
0.00047856	Dacus telfaireae	0.0022096	Carpomya incompleta	0.0011049	Ceratitis punctata	0.002915	Ceratitis catoirii	0.0022096	Carpomya incompleta	0.0040568	Ceratitis rosa	3.5974e-07	Rhagoletis tomatis	0.0016157	Ceratitis quinaria	0.0032802	Bactrocera mayi	0.0013845	Adrama austeni	0.001416	Dacus longicornis	0.0012628	Anastrepha limae	0.0015154	Bactrocera albistrigata	0.0013845	Bactrocera depressa	0.0010102	Adrama determinata	0.014689	Anastrepha ludens	0.047957	Dacus ciliatus	0.061858	Rhagoletis psalida	0.0022608	Ceratitis punctata	0.00049753	Dacus humeralis	0.0032793	Trirhithrum albomaculatum	0.00099506	Ceratitis rubivora	0.0012541	Dacus punctatifrons	0.00074629	Trirhithrum coffeae	0.00099506	Ceratitis rubivora
0.00047856	Dacus arcuyatus	0.0017902	Trirhithrum nigrum	0.0010728	Rhagoletis cerasi	0.0022096	Carpomya incompleta	0.0017902	Trirhithrum nigrum	0.0037284	Dacus frontalis	2.0053e-08	Anastrepha fraterculus	0.0015509	Trirhithrum nigerrimum	0.0032802	Bactrocera opiliae	0.0013371	Toxotrypana curvicauda	0.0013845	Bactrocera depressa	0.0012628	Bactrocera carambolae	0.001416	Dacus longicornis	0.0013845	Bactrocera caryeae	0.0010102	Euphranta lemniscata	0.014349	Anastrepha rheediae	0.038408	Ceratitis rosa	0.061858	Rhagoletis ramosae	0.0020121	Ceratitis anonae	0.00028243	Ceratitis pedestris	0.0022608	Ceratitis punctata	0.00099506	Dacus momordicae	0.00099506	Ceratitis rubivora	0.00065118	Dacus frontalis	0.00099506	Dacus momordicae
0.00047856	Dacus humeralis	0.0016261	Ceratitis cosyra	0.00095711	Ceratitis rubivora	0.0017902	Trirhithrum nigrum	0.0016261	Ceratitis cosyra	0.0035186	Dacus vertebratus	1.8806e-08	Rhagoletis ferruginea	0.0012036	Dacus bivittatus	0.0032802	Bactrocera versicolor	0.001297	Anastrepha antunesi	0.0013845	Bactrocera caryeae	0.0012628	Bactrocera umbrosa	0.0013845	Bactrocera depressa	0.0013845	Adrama austeni	0.00094505	Anastrepha rheediae	0.011064	Anastrepha bahiensis	0.038155	Dacus bivittatus	0.061858	Rhagoletis suavis	0.0012806	Dacus vertebratus	0.00028243	Dacus lounsburyii	0.0020121	Ceratitis anonae	0.00074906	Trirhithrum nigrum	0.00099506	Dacus momordicae	0.00053396	Ceratitis quinaria	0.00074906	Trirhithrum nigrum
0.00027166	Ceratitis pedestris	0.0016157	Ceratitis quinaria	0.00095711	Dacus momordicae	0.0016261	Ceratitis cosyra	0.0016157	Ceratitis quinaria	0.0029474	Ceratitis malgassa	2.1246e-09	Anastrepha grandis	0.0011049	Ceratitis punctata	0.0032802	Bactrocera nigra	0.0012628	Anastrepha leptozona	0.0013845	Adrama austeni	0.0011319	Bactrocera kandiensis	0.0013845	Bactrocera caryeae	0.0013371	Toxotrypana curvicauda	0.00091087	Adrama apicalis	0.0098551	Anastrepha sagittata	0.029201	Ceratitis punctata	0.061858	Rhagoletis zoqui	0.0012541	Dacus punctatifrons	0.00024876	Dacus africanus	0.0012806	Dacus vertebratus	0.00074629	Ceratitis colae	0.00074906	Trirhithrum nigrum	0.00050029	Trirhithrum nigerrimum	0.00074629	Ceratitis colae
0.00027166	Dacus lounsburyii	0.0015509	Trirhithrum nigerrimum	0.00086562	Ceratitis anonae	0.0016157	Ceratitis quinaria	0.0015509	Trirhithrum nigerrimum	0.0029474	Dacus demmerezi	1.8053e-09	Anastrepha chiclayae	0.0010728	Rhagoletis cerasi	0.0032802	Bactrocera duplicata	0.0012628	Anastrepha limae	0.0013371	Toxotrypana curvicauda	0.0011319	Euphranta camelliae	0.0013845	Adrama austeni	0.001297	Anastrepha antunesi	0.0008944	Anastrepha ludens	0.0066189	Rhagoletis cingulata	0.028916	Ceratitis discussa	0.061516	Ceratitis cosyra	0.00099506	Ceratitis rubivora	0.00024876	Dacus vansomereni	0.0012541	Dacus punctatifrons	0.00074629	Trirhithrum coffeae	0.00074629	Ceratitis colae	0.00049847	Acanthiophilus helianthi	0.00074629	Trirhithrum coffeae
0.0002465	Trirhithrum albomaculatum	0.0012036	Dacus bivittatus	0.00075022	Trirhithrum coffeae	0.0015509	Trirhithrum nigerrimum	0.0012036	Dacus bivittatus	0.0029474	Neoceratitis cyanescens	1.2512e-09	Anastrepha obliqua	0.00095711	Ceratitis rubivora	0.0032802	Bactrocera cucumis	0.0012628	Bactrocera carambolae	0.001297	Anastrepha antunesi	0.0011319	Euphranta japonica	0.0013371	Toxotrypana curvicauda	0.0012628	Anastrepha leptozona	0.00075768	Anastrepha sagittata	0.0065812	Rhagoletis pomonella	0.026121	Ceratitis anonae	0.047957	Dacus ciliatus	0.00099506	Dacus momordicae	0.00024876	Zacerata asparagi	0.00099506	Ceratitis rubivora	0.00065118	Dacus frontalis	0.00074629	Trirhithrum coffeae	0.00049753	Dacus telfaireae	0.00065118	Dacus frontalis
0.00023928	Dacus africanus	0.0011049	Ceratitis punctata	0.00071783	Ceratitis colae	0.0012036	Dacus bivittatus	0.0011049	Ceratitis punctata	0.0029474	Trirhithromyia cyanescens	1.2329e-09	Anastrepha sororcula	0.00095711	Dacus momordicae	0.0032802	Bactrocera frauenfeldi	0.0012628	Bactrocera umbrosa	0.0012628	Anastrepha leptozona	0.0010102	Bactrocera pedestris	0.001297	Anastrepha antunesi	0.0012628	Anastrepha limae	0.00075768	Bactrocera arecae	0.0065782	Rhagoletis striatella	0.025836	Trirhithrum albomaculatum	0.038408	Ceratitis rosa	0.00074906	Trirhithrum nigrum	0.00015088	Rhagoletis conversa	0.00099506	Dacus momordicae	0.00053396	Ceratitis quinaria	0.00065118	Dacus frontalis	0.00049753	Dacus arcuyatus	0.00053396	Ceratitis quinaria
0.00023928	Dacus vansomereni	0.0010728	Rhagoletis cerasi	0.00048578	Ceratitis discussa	0.0011049	Ceratitis punctata	0.0010728	Rhagoletis cerasi	0.002915	Ceratitis catoirii	1.227e-09	Anastrepha daciformis	0.00086562	Ceratitis anonae	0.0032802	Bactrocera jarvisi	0.0011319	Bactrocera kandiensis	0.0012628	Anastrepha limae	0.0010102	Bactrocera papayae	0.0012628	Anastrepha leptozona	0.0012628	Bactrocera carambolae	0.00075768	Monacrostichus citricola	0.0065782	Neotephritis finalis	0.016719	Dacus vertebratus	0.038155	Dacus bivittatus	0.00074629	Ceratitis colae	4.1179e-05	Ceratitis malgassa	0.00074906	Trirhithrum nigrum	0.00050029	Trirhithrum nigerrimum	0.00053396	Ceratitis quinaria	0.00049753	Dacus humeralis	0.00050029	Trirhithrum nigerrimum
0.00023928	Zacerata asparagi	0.00095711	Ceratitis rubivora	0.00047856	Dacus telfaireae	0.0010728	Rhagoletis cerasi	0.00095711	Ceratitis rubivora	0.0022096	Carpomya incompleta	9.214e-10	Anastrepha serpentina	0.00075022	Trirhithrum coffeae	0.0032802	Bactrocera neohumeralis	0.0011319	Euphranta camelliae	0.0012628	Bactrocera carambolae	0.0010102	Adrama determinata	0.0012628	Anastrepha limae	0.0012628	Bactrocera umbrosa	0.00069249	Anastrepha bahiensis	0.00657	Anastrepha bistrigata	0.015805	Dacus punctatifrons	0.029201	Ceratitis punctata	0.00074629	Trirhithrum coffeae	4.1179e-05	Dacus demmerezi	0.00074629	Ceratitis colae	0.00049847	Acanthiophilus helianthi	0.00050029	Trirhithrum nigerrimum	0.00028243	Ceratitis pedestris	0.00049847	Acanthiophilus helianthi
3.5974e-07	Rhagoletis conversa	0.00095711	Dacus momordicae	0.00047856	Dacus arcuyatus	0.00095711	Ceratitis rubivora	0.00095711	Dacus momordicae	0.0017902	Trirhithrum nigrum	9.1992e-10	Anastrepha distincta	0.00071783	Ceratitis colae	0.0032802	Bactrocera philippinensis	0.0011319	Euphranta japonica	0.0012628	Bactrocera umbrosa	0.0010102	Euphranta lemniscata	0.0012628	Bactrocera carambolae	0.0011319	Bactrocera kandiensis	0.00065831	Bactrocera tuberculata	0.00657	Anastrepha minensis	0.012319	Ceratitis rubivora	0.028916	Ceratitis discussa	0.00065118	Dacus frontalis	4.1179e-05	Neoceratitis cyanescens	0.00074629	Trirhithrum coffeae	0.00049753	Dacus telfaireae	0.00049847	Acanthiophilus helianthi	0.00028243	Dacus lounsburyii	0.00049753	Dacus telfaireae
3.5974e-07	Rhagoletis tomatis	0.00086562	Ceratitis anonae	0.00047856	Dacus humeralis	0.00095711	Dacus momordicae	0.00086562	Ceratitis anonae	0.0016261	Ceratitis cosyra	9.1825e-10	Anastrepha striata	0.00048578	Ceratitis discussa	0.0032802	Bactrocera tryoni	0.0010102	Bactrocera pedestris	0.0011319	Bactrocera kandiensis	0.00094505	Anastrepha rheediae	0.0012628	Bactrocera umbrosa	0.0011319	Euphranta camelliae	0.00053939	Rhagoletis pomonella	0.00657	Anastrepha pallidipennis	0.012319	Dacus momordicae	0.026121	Ceratitis anonae	0.00053396	Ceratitis quinaria	4.1179e-05	Trirhithromyia cyanescens	0.00065118	Dacus frontalis	0.00049753	Dacus arcuyatus	0.00049753	Dacus telfaireae	0.00024876	Dacus africanus	0.00049753	Dacus arcuyatus
8.9562e-08	Rhagoletis completa	0.00075022	Trirhithrum coffeae	0.00027166	Ceratitis pedestris	0.00086562	Ceratitis anonae	0.00075022	Trirhithrum coffeae	0.0016157	Ceratitis quinaria	1.8714e-11	Anastrepha antunesi	0.00047856	Dacus telfaireae	0.0032802	Bactrocera melas	0.0010102	Bactrocera papayae	0.0011319	Euphranta camelliae	0.00091087	Adrama apicalis	0.0011319	Bactrocera kandiensis	0.0011319	Euphranta japonica	0.00050816	Rhagoletis cingulata	0.00657	Anastrepha panamensis	0.0093925	Dacus frontalis	0.025836	Trirhithrum albomaculatum	0.00050029	Trirhithrum nigerrimum	3.3667e-05	Trirhithrum manganum	0.00053396	Ceratitis quinaria	0.00049753	Dacus humeralis	0.00049753	Dacus arcuyatus	0.00024876	Dacus vansomereni	0.00049753	Dacus humeralis
7.1984e-08	Rhagoletis cingulata	0.00071783	Ceratitis colae	0.00027166	Dacus lounsburyii	0.00075022	Trirhithrum coffeae	0.00071783	Ceratitis colae	0.0015509	Trirhithrum nigerrimum	1.2905e-11	Anastrepha ludens	0.00047856	Dacus arcuyatus	0.0032802	Bactrocera mutabilis	0.0010102	Adrama determinata	0.0011319	Euphranta japonica	0.0008944	Anastrepha ludens	0.0011319	Euphranta camelliae	0.0010102	Bactrocera pedestris	0.00050521	Rhagoletis striatella	0.00657	Anastrepha parishi	0.0074458	Ceratitis quinaria	0.016719	Dacus vertebratus	0.00049847	Acanthiophilus helianthi	7.5964e-06	Carpomya vesuviana	0.00050029	Trirhithrum nigerrimum	0.00028243	Ceratitis pedestris	0.00049753	Dacus humeralis	0.00024876	Zacerata asparagi	0.00028243	Ceratitis pedestris
2.0053e-08	Anastrepha fraterculus	0.00048578	Ceratitis discussa	0.0002465	Trirhithrum albomaculatum	0.00071783	Ceratitis colae	0.00048578	Ceratitis discussa	0.0012036	Dacus bivittatus	7.2896e-12	Rhagoletis striatella	0.00047856	Dacus humeralis	0.0032802	Bactrocera trimaculata	0.0010102	Euphranta lemniscata	0.0010102	Bactrocera pedestris	0.00075768	Anastrepha sagittata	0.0011319	Euphranta japonica	0.0010102	Bactrocera papayae	0.00050521	Neotephritis finalis	0.00657	Anastrepha perdita	0.0062404	Acanthiophilus helianthi	0.015805	Dacus punctatifrons	0.00049753	Dacus telfaireae	7.512e-06	Ceratitis catoirii	0.00049847	Acanthiophilus helianthi	0.00028243	Dacus lounsburyii	0.00028243	Ceratitis pedestris	0.00015088	Rhagoletis conversa	0.00028243	Dacus lounsburyii
1.8806e-08	Rhagoletis ferruginea	0.00047856	Dacus telfaireae	0.00023928	Dacus africanus	0.00048578	Ceratitis discussa	0.00047856	Dacus telfaireae	0.0011049	Ceratitis punctata	5.895e-12	Anastrepha suspensa	0.00027166	Ceratitis pedestris	0.0032802	Dacus petioliformus	0.00094505	Anastrepha rheediae	0.0010102	Bactrocera papayae	0.00075768	Bactrocera arecae	0.0010102	Bactrocera pedestris	0.0010102	Adrama determinata	0.00050512	Anastrepha bistrigata	0.00657	Rhagoletis boycei	0.0061595	Dacus telfaireae	0.012319	Ceratitis rubivora	0.00049753	Dacus arcuyatus	1.122e-06	Dirioxa pornia	0.00049753	Dacus telfaireae	0.00024876	Dacus africanus	0.00028243	Dacus lounsburyii	4.1179e-05	Ceratitis malgassa	0.00024876	Dacus africanus
1.7914e-08	Rhagoletis indifferens	0.00047856	Dacus arcuyatus	0.00023928	Dacus vansomereni	0.00047856	Dacus telfaireae	0.00047856	Dacus arcuyatus	0.0010728	Rhagoletis cerasi	3.6454e-12	Zonosemata electa	0.00027166	Dacus lounsburyii	0.0032802	Dacus eumenoides	0.00091087	Adrama apicalis	0.0010102	Adrama determinata	0.00075768	Monacrostichus citricola	0.0010102	Bactrocera papayae	0.0010102	Euphranta lemniscata	0.00050512	Anastrepha minensis	0.00657	Rhagoletis juglandis	0.0061595	Dacus arcuyatus	0.012319	Dacus momordicae	0.00049753	Dacus humeralis	8.3239e-07	Carpomya pardalina	0.00049753	Dacus arcuyatus	0.00024876	Dacus vansomereni	0.00024876	Dacus africanus	4.1179e-05	Dacus demmerezi	0.00024876	Dacus vansomereni
2.1246e-09	Anastrepha grandis	0.00047856	Dacus humeralis	0.00023928	Zacerata asparagi	0.00047856	Dacus arcuyatus	0.00047856	Dacus humeralis	0.00095711	Ceratitis rubivora	3.6442e-12	Rhagoletis lycopersella	0.0002465	Trirhithrum albomaculatum	0.0032802	Dacus aequalis	0.0008944	Anastrepha ludens	0.0010102	Euphranta lemniscata	0.00069249	Anastrepha bahiensis	0.0010102	Adrama determinata	0.00094505	Anastrepha rheediae	0.00050512	Anastrepha panamensis	0.0038275	Bactrocera dorsalis	0.0061595	Dacus humeralis	0.0093925	Dacus frontalis	0.00028243	Ceratitis pedestris	7.48e-07	Bactrocera curvipennis	0.00049753	Dacus humeralis	0.00024876	Zacerata asparagi	0.00024876	Dacus vansomereni	4.1179e-05	Neoceratitis cyanescens	0.00024876	Zacerata asparagi
2.1224e-09	Anastrepha macrura	0.00027166	Ceratitis pedestris	3.2383e-05	Trirhithrum manganum	0.00047856	Dacus humeralis	0.00027166	Ceratitis pedestris	0.00095711	Dacus momordicae	3.6442e-12	Rhagoletis psalida	0.00023928	Dacus africanus	0.0032802	Rhagoletis conversa	0.00075768	Anastrepha sagittata	0.00094505	Anastrepha rheediae	0.00065831	Bactrocera tuberculata	0.0010102	Euphranta lemniscata	0.00091087	Adrama apicalis	0.00050512	Anastrepha parishi	0.0037182	Anastrepha ocresia	0.0042127	Ceratitis pedestris	0.0093925	Trirhithrum nigrum	0.00028243	Dacus lounsburyii	7.48e-07	Bactrocera passiflorae	0.00028243	Ceratitis pedestris	0.00015088	Rhagoletis conversa	0.00024876	Zacerata asparagi	4.1179e-05	Trirhithromyia cyanescens	0.00015088	Rhagoletis conversa
1.8053e-09	Anastrepha chiclayae	0.00027166	Dacus lounsburyii	3.5974e-07	Rhagoletis conversa	0.00027166	Ceratitis pedestris	0.00027166	Dacus lounsburyii	0.00086562	Ceratitis anonae	2.7161e-17	Bactrocera passiflorae	0.00023928	Dacus vansomereni	0.0032802	Dirioxa confusa	0.00075768	Bactrocera arecae	0.00091087	Adrama apicalis	0.00053939	Rhagoletis pomonella	0.00094505	Anastrepha rheediae	0.0008944	Anastrepha ludens	0.00050512	Anastrepha perdita	0.0037182	Anastrepha suspensa	0.0042127	Dacus lounsburyii	0.0092392	Ceratitis colae	0.00024876	Dacus africanus	7.48e-07	Bactrocera xanthodes	0.00028243	Dacus lounsburyii	4.1179e-05	Ceratitis malgassa	0.00015088	Rhagoletis conversa	3.3667e-05	Trirhithrum manganum	4.1179e-05	Ceratitis malgassa
1.7907e-09	Anastrepha pseudoparallela	0.0002465	Trirhithrum albomaculatum	3.5974e-07	Rhagoletis tomatis	0.00027166	Dacus lounsburyii	0.0002465	Trirhithrum albomaculatum	0.00075022	Trirhithrum coffeae	2.7161e-17	Bactrocera xanthodes	0.00023928	Zacerata asparagi	0.0032802	Dirioxa pornia	0.00075768	Monacrostichus citricola	0.0008944	Anastrepha ludens	0.0005393	Anastrepha pallens	0.00091087	Adrama apicalis	0.00075768	Anastrepha sagittata	0.00050512	Bactrocera musae	0.0032932	Rhagoletis basiola	0.0030797	Dacus africanus	0.0092392	Trirhithrum coffeae	0.00024876	Dacus vansomereni	3.7437e-07	Bactrocera tau	0.00024876	Dacus africanus	4.1179e-05	Dacus demmerezi	4.1179e-05	Ceratitis malgassa	7.5964e-06	Carpomya vesuviana	4.1179e-05	Dacus demmerezi
1.2512e-09	Anastrepha obliqua	0.00023928	Dacus africanus	8.9562e-08	Rhagoletis completa	0.0002465	Trirhithrum albomaculatum	0.00023928	Dacus africanus	0.00071783	Ceratitis colae			3.2383e-05	Trirhithrum manganum	0.0032802	Monacrostichus malaysiae	0.00069249	Anastrepha bahiensis	0.00075768	Anastrepha sagittata	0.00050816	Rhagoletis cingulata	0.0008944	Anastrepha ludens	0.00075768	Bactrocera arecae	0.00050512	Bactrocera jarvisi	0.0032932	Rhagoletis fausta	0.0030797	Dacus vansomereni	0.0074458	Ceratitis quinaria	0.00024876	Zacerata asparagi	3.7435e-07	Bactrocera depressa	0.00024876	Dacus vansomereni	4.1179e-05	Neoceratitis cyanescens	4.1179e-05	Dacus demmerezi	7.512e-06	Ceratitis catoirii	4.1179e-05	Neoceratitis cyanescens
1.2329e-09	Anastrepha sororcula	0.00023928	Dacus vansomereni	7.1984e-08	Rhagoletis cingulata	0.00023928	Dacus africanus	0.00023928	Dacus vansomereni	0.00048578	Ceratitis discussa			3.5974e-07	Rhagoletis conversa	0.0019915	Anastrepha fraterculus	0.00065831	Bactrocera tuberculata	0.00075768	Bactrocera arecae	0.00050521	Rhagoletis striatella	0.00075768	Anastrepha sagittata	0.00075768	Monacrostichus citricola	0.00050512	Bactrocera bryoniae	0.0032932	Rhagoletis indifferens	0.0030797	Rhagoletis conversa	0.0063128	Trirhithrum nigerrimum	0.00015088	Rhagoletis conversa	3.7435e-07	Bactrocera scutellata	0.00024876	Zacerata asparagi	4.1179e-05	Trirhithromyia cyanescens	4.1179e-05	Neoceratitis cyanescens	1.122e-06	Dirioxa pornia	4.1179e-05	Trirhithromyia cyanescens
1.227e-09	Anastrepha daciformis	0.00023928	Zacerata asparagi	2.0053e-08	Anastrepha fraterculus	0.00023928	Dacus vansomereni	0.00023928	Zacerata asparagi	0.00047856	Dacus telfaireae			3.5974e-07	Rhagoletis tomatis	0.0014841	Rhagoletis ferruginea	0.00053939	Rhagoletis pomonella	0.00075768	Monacrostichus citricola	0.00050521	Neotephritis finalis	0.00075768	Bactrocera arecae	0.00069249	Anastrepha bahiensis	0.00050512	Bactrocera trivialis	0.0032932	Rhagoletis mendax	0.0030797	Zacerata asparagi	0.0062404	Acanthiophilus helianthi	4.1179e-05	Ceratitis malgassa	3.7434e-07	Euphranta camelliae	0.00015088	Rhagoletis conversa	3.3667e-05	Trirhithrum manganum	4.1179e-05	Trirhithromyia cyanescens	8.3239e-07	Carpomya pardalina	3.3667e-05	Trirhithrum manganum
1.2234e-09	Anastrepha punctata	3.2383e-05	Trirhithrum manganum	1.8806e-08	Rhagoletis ferruginea	0.00023928	Zacerata asparagi	3.2383e-05	Trirhithrum manganum	0.00047856	Dacus arcuyatus			8.9562e-08	Rhagoletis completa	0.001223	Rhagoletis pomonella	0.0005393	Anastrepha pallens	0.00069249	Anastrepha bahiensis	0.00050512	Anastrepha bistrigata	0.00075768	Monacrostichus citricola	0.00065831	Bactrocera tuberculata	0.00050512	Bactrocera munda	0.0032932	Rhagoletis ribicola	0.0013858	Ceratitis malgassa	0.0061595	Dacus telfaireae	4.1179e-05	Dacus demmerezi	3.7434e-07	Euphranta japonica	4.1179e-05	Ceratitis malgassa	7.5964e-06	Carpomya vesuviana	3.3667e-05	Trirhithrum manganum	7.48e-07	Bactrocera curvipennis	7.5964e-06	Carpomya vesuviana
9.214e-10	Anastrepha serpentina	3.5974e-07	Rhagoletis conversa	1.7914e-08	Rhagoletis indifferens	3.2383e-05	Trirhithrum manganum	3.5974e-07	Rhagoletis conversa	0.00047856	Dacus humeralis			7.1984e-08	Rhagoletis cingulata	0.00073435	Anastrepha grandis	0.00050816	Rhagoletis cingulata	0.00065831	Bactrocera tuberculata	0.00050512	Anastrepha minensis	0.00069249	Anastrepha bahiensis	0.00053939	Rhagoletis pomonella	0.00050512	Bactrocera minax	0.0032932	Rhagoletis tabellaria	0.0013858	Dacus demmerezi	0.0061595	Dacus arcuyatus	4.1179e-05	Neoceratitis cyanescens	3.7402e-07	Bactrocera umbrosa	4.1179e-05	Dacus demmerezi	7.512e-06	Ceratitis catoirii	7.5964e-06	Carpomya vesuviana	7.48e-07	Bactrocera passiflorae	7.512e-06	Ceratitis catoirii
9.1992e-10	Anastrepha distincta	3.5974e-07	Rhagoletis tomatis	2.1246e-09	Anastrepha grandis	3.5974e-07	Rhagoletis conversa	3.5974e-07	Rhagoletis tomatis	0.00027166	Ceratitis pedestris			2.0053e-08	Anastrepha fraterculus	0.00072622	Anastrepha macrura	0.00050521	Rhagoletis striatella	0.00053939	Rhagoletis pomonella	0.00050512	Anastrepha panamensis	0.00065831	Bactrocera tuberculata	0.0005393	Anastrepha pallens	0.00050512	Bactrocera occipitalis	0.0032932	Euphranta canadensis	0.0013858	Neoceratitis cyanescens	0.0061595	Dacus humeralis	4.1179e-05	Trirhithromyia cyanescens	3.7402e-07	Euphranta lemniscata	4.1179e-05	Neoceratitis cyanescens	1.122e-06	Dirioxa pornia	7.512e-06	Ceratitis catoirii	7.48e-07	Bactrocera xanthodes	1.122e-06	Dirioxa pornia
9.1825e-10	Anastrepha striata	8.9562e-08	Rhagoletis completa	2.1224e-09	Anastrepha macrura	3.5974e-07	Rhagoletis tomatis	8.9562e-08	Rhagoletis completa	0.00027166	Dacus lounsburyii			1.8806e-08	Rhagoletis ferruginea	0.0005873	Anastrepha chiclayae	0.00050512	Anastrepha bistrigata	0.0005393	Anastrepha pallens	0.00050512	Anastrepha parishi	0.00053939	Rhagoletis pomonella	0.00050816	Rhagoletis cingulata	0.00050512	Dacus axanus	0.0032932	Gymnocarena diffusa	0.0013858	Trirhithromyia cyanescens	0.0042127	Ceratitis pedestris	3.3667e-05	Trirhithrum manganum	3.7401e-07	Bactrocera tryoni	4.1179e-05	Trirhithromyia cyanescens	8.3239e-07	Carpomya pardalina	1.122e-06	Dirioxa pornia	3.7437e-07	Bactrocera tau	8.3239e-07	Carpomya pardalina
8.9756e-10	Anastrepha ornate	7.1984e-08	Rhagoletis cingulata	1.8053e-09	Anastrepha chiclayae	8.9562e-08	Rhagoletis completa	7.1984e-08	Rhagoletis cingulata	0.0002465	Trirhithrum albomaculatum			1.7914e-08	Rhagoletis indifferens	0.00055477	Anastrepha pseudoparallela	0.00050512	Anastrepha minensis	0.00050816	Rhagoletis cingulata	0.00050512	Anastrepha perdita	0.00050816	Rhagoletis cingulata	0.00050521	Rhagoletis striatella	0.00050512	Dacus smieroides	0.0032932	Paracantha cultaris	0.00026052	Carpomya vesuviana	0.0042127	Dacus lounsburyii	7.5964e-06	Carpomya vesuviana	3.74e-07	Bactrocera distincta	3.3667e-05	Trirhithrum manganum	7.48e-07	Bactrocera curvipennis	8.3239e-07	Carpomya pardalina	3.7435e-07	Bactrocera depressa	7.48e-07	Bactrocera curvipennis
8.9634e-10	Anastrepha ethalea	2.0053e-08	Anastrepha fraterculus	1.7907e-09	Anastrepha pseudoparallela	7.1984e-08	Rhagoletis cingulata	2.0053e-08	Anastrepha fraterculus	0.00023928	Dacus africanus			2.1246e-09	Anastrepha grandis	0.00051382	Anastrepha obliqua	0.00050512	Anastrepha panamensis	0.00050521	Rhagoletis striatella	0.00050512	Bactrocera musae	0.00050521	Rhagoletis striatella	0.00050512	Anastrepha bistrigata	0.00050512	Rhagoletis boycei	0.0032932	Strauzia longipennis	0.0002528	Ceratitis catoirii	0.0030797	Dacus africanus	7.512e-06	Ceratitis catoirii	3.74e-07	Bactrocera simulata	7.5964e-06	Carpomya vesuviana	7.48e-07	Bactrocera passiflorae	7.48e-07	Bactrocera curvipennis	3.7435e-07	Bactrocera scutellata	7.48e-07	Bactrocera passiflorae
8.9535e-10	Anastrepha consobrina	1.8806e-08	Rhagoletis ferruginea	1.2512e-09	Anastrepha obliqua	2.0053e-08	Anastrepha fraterculus	1.8806e-08	Rhagoletis ferruginea	0.00023928	Dacus vansomereni			2.1224e-09	Anastrepha macrura	0.00050629	Carpomya incompleta	0.00050512	Anastrepha parishi	0.00050512	Anastrepha bistrigata	0.00050512	Bactrocera jarvisi	0.00050521	Neotephritis finalis	0.00050512	Anastrepha minensis	0.00050512	Rhagoletis juglandis	0.0032932	Zonosemata electa	1.3393e-05	Carpomya pardalina	0.0030797	Dacus vansomereni	1.122e-06	Dirioxa pornia	2.4169e-07	Rhagoletis cerasi	7.512e-06	Ceratitis catoirii	7.48e-07	Bactrocera xanthodes	7.48e-07	Bactrocera passiflorae	3.7434e-07	Euphranta camelliae	7.48e-07	Bactrocera xanthodes
8.917e-10	Anastrepha mburucuyae	1.7914e-08	Rhagoletis indifferens	1.2438e-09	Anastrepha montei	1.8806e-08	Rhagoletis ferruginea	1.7914e-08	Rhagoletis indifferens	0.00023928	Zacerata asparagi			1.8053e-09	Anastrepha chiclayae	0.00048948	Anastrepha montei	0.00050512	Anastrepha perdita	0.00050512	Anastrepha minensis	0.00050512	Bactrocera bryoniae	0.00050512	Anastrepha bistrigata	0.00050512	Anastrepha panamensis	0.00050512	Callistomyia flavilavris	0.0032862	Rhagoletis completa	8.426e-06	Dirioxa pornia	0.0030797	Rhagoletis conversa	8.3239e-07	Carpomya pardalina	8.3451e-08	Carpomya incompleta	1.122e-06	Dirioxa pornia	3.7437e-07	Bactrocera tau	7.48e-07	Bactrocera xanthodes	3.7434e-07	Euphranta japonica	3.7437e-07	Bactrocera tau
8.917e-10	Anastrepha schultzi	2.1246e-09	Anastrepha grandis	1.2329e-09	Anastrepha sororcula	1.7914e-08	Rhagoletis indifferens	2.1246e-09	Anastrepha grandis	3.2383e-05	Trirhithrum manganum			1.7907e-09	Anastrepha pseudoparallela	0.00046509	Anastrepha sororcula	0.00050512	Bactrocera musae	0.00050512	Anastrepha panamensis	0.00050512	Bactrocera trivialis	0.00050512	Anastrepha minensis	0.00050512	Anastrepha parishi	0.00050512	Epochra Canadensis	0.003285	Anastrepha manizaliensis	7.634e-06	Carpomya incompleta	0.0030797	Zacerata asparagi	7.48e-07	Bactrocera curvipennis	1.035e-09	Bactrocera correcta	8.3239e-07	Carpomya pardalina	3.7435e-07	Bactrocera depressa	3.7437e-07	Bactrocera tau	3.7402e-07	Bactrocera umbrosa	3.7435e-07	Bactrocera depressa
8.917e-10	Anastrepha turicai	2.1224e-09	Anastrepha macrura	1.227e-09	Anastrepha daciformis	2.1246e-09	Anastrepha grandis	2.1224e-09	Anastrepha macrura	3.5974e-07	Rhagoletis conversa			1.2512e-09	Anastrepha obliqua	0.00044883	Anastrepha daciformis	0.00050512	Bactrocera jarvisi	0.00050512	Anastrepha parishi	0.00050512	Bactrocera munda	0.00050512	Anastrepha panamensis	0.00050512	Anastrepha perdita	0.00040575	Anastrepha pallidipennis	0.003285	Anastrepha margarita	6.7562e-06	Rhagoletis cerasi	0.0013858	Ceratitis malgassa	7.48e-07	Bactrocera passiflorae	6.9397e-10	Bactrocera diversa	7.48e-07	Bactrocera curvipennis	3.7435e-07	Bactrocera scutellata	3.7435e-07	Bactrocera depressa	3.7402e-07	Euphranta lemniscata	3.7435e-07	Bactrocera scutellata
8.917e-10	Anastrepha zuelaniae	1.8053e-09	Anastrepha chiclayae	1.2234e-09	Anastrepha punctata	2.1224e-09	Anastrepha macrura	1.8053e-09	Anastrepha chiclayae	3.5974e-07	Rhagoletis tomatis			1.2438e-09	Anastrepha montei	0.0004407	Anastrepha punctata	0.00050512	Bactrocera bryoniae	0.00050512	Anastrepha perdita	0.00050512	Bactrocera minax	0.00050512	Anastrepha parishi	0.00050512	Bactrocera musae	0.00033263	Carpomya pardalina	0.003285	Anastrepha nigrifascia	5.6167e-06	Bactrocera curvipennis	0.0013858	Dacus demmerezi	7.48e-07	Bactrocera xanthodes	3.6229e-10	Bactrocera caudata	7.48e-07	Bactrocera passiflorae	3.7434e-07	Euphranta camelliae	3.7435e-07	Bactrocera scutellata	3.7401e-07	Bactrocera tryoni	3.7434e-07	Euphranta japonica
2.1865e-11	Anastrepha bezzii	1.7907e-09	Anastrepha pseudoparallela	9.214e-10	Anastrepha serpentina	1.8053e-09	Anastrepha chiclayae	1.7907e-09	Anastrepha pseudoparallela	8.9562e-08	Rhagoletis completa			1.2329e-09	Anastrepha sororcula	0.00034627	Anastrepha serpentina	0.00050512	Bactrocera trivialis	0.00050512	Bactrocera musae	0.00050512	Bactrocera occipitalis	0.00050512	Anastrepha perdita	0.00050512	Bactrocera jarvisi	0.00026299	Anastrepha ocresia	0.003285	Anastrepha passiflorae	5.6167e-06	Bactrocera passiflorae	0.0013858	Neoceratitis cyanescens	3.7437e-07	Bactrocera tau	3.4713e-10	Bactrocera tsuneonis	7.48e-07	Bactrocera xanthodes	3.7434e-07	Euphranta japonica	3.7434e-07	Euphranta camelliae	3.74e-07	Bactrocera distincta	3.7402e-07	Bactrocera umbrosa
1.9294e-11	Toxotrypana curvicauda	1.2512e-09	Anastrepha obliqua	9.1992e-10	Anastrepha distincta	1.7907e-09	Anastrepha pseudoparallela	1.2512e-09	Anastrepha obliqua	7.1984e-08	Rhagoletis cingulata			1.227e-09	Anastrepha daciformis	0.00034113	Anastrepha striata	0.00050512	Bactrocera munda	0.00050512	Bactrocera jarvisi	0.00050512	Dacus axanus	0.00050512	Bactrocera musae	0.00050512	Bactrocera bryoniae	0.00026299	Anastrepha suspensa	0.003285	Anastrepha steyskali	5.6167e-06	Bactrocera xanthodes	0.0013858	Trirhithromyia cyanescens	3.7435e-07	Bactrocera depressa	3.4483e-10	Bactrocera caryeae	3.7437e-07	Bactrocera tau	3.7402e-07	Bactrocera umbrosa	3.7434e-07	Euphranta japonica	3.74e-07	Bactrocera simulata	3.7402e-07	Euphranta lemniscata
1.8714e-11	Anastrepha antunesi	1.2438e-09	Anastrepha montei	9.1825e-10	Anastrepha striata	1.2512e-09	Anastrepha obliqua	1.2438e-09	Anastrepha montei	2.0053e-08	Anastrepha fraterculus			1.2234e-09	Anastrepha punctata	0.00033729	Anastrepha distincta	0.00050512	Bactrocera minax	0.00050512	Bactrocera bryoniae	0.00050512	Dacus smieroides	0.00050512	Bactrocera jarvisi	0.00050512	Bactrocera trivialis	0.00025265	Rhagoletis basiola	0.003285	Rhagoletis lycopersella	2.9007e-06	Bactrocera tau	0.001133	Trirhithrum manganum	3.7435e-07	Bactrocera scutellata	3.4483e-10	Adrama austeni	3.7435e-07	Bactrocera depressa	3.7402e-07	Euphranta lemniscata	3.7402e-07	Bactrocera umbrosa	2.4169e-07	Rhagoletis cerasi	3.7401e-07	Bactrocera tryoni
1.8221e-11	Anastrepha leptozona	1.2329e-09	Anastrepha sororcula	9.1214e-10	Anastrepha manihoti	1.2438e-09	Anastrepha montei	1.2329e-09	Anastrepha sororcula	1.8806e-08	Rhagoletis ferruginea			9.214e-10	Anastrepha serpentina	0.00031804	Anastrepha manihoti	0.00050512	Bactrocera occipitalis	0.00050512	Bactrocera trivialis	0.00050512	Rhagoletis boycei	0.00050512	Bactrocera bryoniae	0.00050512	Bactrocera munda	0.00025265	Rhagoletis fausta	0.003285	Rhagoletis nova	2.896e-06	Bactrocera scutellata	0.00026052	Carpomya vesuviana	3.7434e-07	Euphranta camelliae	3.4105e-10	Bactrocera kandiensis	3.7435e-07	Bactrocera scutellata	3.7401e-07	Bactrocera tryoni	3.7402e-07	Euphranta lemniscata	8.3451e-08	Carpomya incompleta	3.74e-07	Bactrocera distincta
1.8221e-11	Anastrepha limae	1.227e-09	Anastrepha daciformis	9.1042e-10	Anastrepha pickeli	1.2329e-09	Anastrepha sororcula	1.227e-09	Anastrepha daciformis	1.7914e-08	Rhagoletis indifferens			9.1992e-10	Anastrepha distincta	0.0003129	Anastrepha pickeli	0.00050512	Dacus axanus	0.00050512	Bactrocera munda	0.00050512	Rhagoletis juglandis	0.00050512	Bactrocera trivialis	0.00050512	Bactrocera minax	0.00025265	Rhagoletis indifferens	0.003285	Rhagoletis psalida	2.8941e-06	Bactrocera depressa	0.0002528	Ceratitis catoirii	3.7434e-07	Euphranta japonica	2.2732e-11	Bactrocera albistrigata	3.7434e-07	Euphranta camelliae	3.74e-07	Bactrocera distincta	3.7401e-07	Bactrocera tryoni	1.035e-09	Bactrocera correcta	3.74e-07	Bactrocera simulata
1.3636e-11	Anastrepha rheediae	1.2234e-09	Anastrepha punctata	8.9756e-10	Anastrepha ornate	1.227e-09	Anastrepha daciformis	1.2234e-09	Anastrepha punctata	2.1246e-09	Anastrepha grandis			9.1825e-10	Anastrepha striata	0.00028552	Anastrepha ornate	0.00050512	Dacus smieroides	0.00050512	Bactrocera minax	0.00050512	Callistomyia flavilavris	0.00050512	Bactrocera munda	0.00050512	Bactrocera occipitalis	0.00025265	Rhagoletis mendax	0.003285	Rhagoletis ramosae	2.8932e-06	Euphranta camelliae	1.3393e-05	Carpomya pardalina	3.7402e-07	Bactrocera umbrosa	2.1241e-11	Dacus longicornis	3.7434e-07	Euphranta japonica	3.74e-07	Bactrocera simulata	3.74e-07	Bactrocera distincta	6.9397e-10	Bactrocera diversa	2.4169e-07	Rhagoletis cerasi
1.2905e-11	Anastrepha ludens	9.214e-10	Anastrepha serpentina	8.9634e-10	Anastrepha ethalea	1.2234e-09	Anastrepha punctata	9.214e-10	Anastrepha serpentina	2.1224e-09	Anastrepha macrura			9.1214e-10	Anastrepha manihoti	0.00028337	Anastrepha ethalea	0.00050512	Rhagoletis boycei	0.00050512	Bactrocera occipitalis	0.00050512	Epochra Canadensis	0.00050512	Bactrocera minax	0.00050512	Dacus axanus	0.00025265	Rhagoletis ribicola	0.003285	Rhagoletis suavis	2.8932e-06	Euphranta japonica	8.426e-06	Dirioxa pornia	3.7402e-07	Euphranta lemniscata	1.8943e-11	Bactrocera carambolae	3.7402e-07	Bactrocera umbrosa	2.4169e-07	Rhagoletis cerasi	3.74e-07	Bactrocera simulata	3.6229e-10	Bactrocera caudata	8.3451e-08	Carpomya incompleta
1.0933e-11	Anastrepha sagittata	9.1992e-10	Anastrepha distincta	8.9535e-10	Anastrepha consobrina	9.214e-10	Anastrepha serpentina	9.1992e-10	Anastrepha distincta	1.8053e-09	Anastrepha chiclayae			9.1042e-10	Anastrepha pickeli	0.00027739	Anastrepha consobrina	0.00050512	Rhagoletis juglandis	0.00050512	Dacus axanus	0.00040575	Anastrepha pallidipennis	0.00050512	Bactrocera occipitalis	0.00050512	Dacus smieroides	0.00025265	Rhagoletis tabellaria	0.003285	Rhagoletis zoqui	2.8131e-06	Bactrocera umbrosa	7.634e-06	Carpomya incompleta	3.7401e-07	Bactrocera tryoni	1.5155e-11	Bactrocera pedestris	3.7402e-07	Euphranta lemniscata	8.3451e-08	Carpomya incompleta	2.4169e-07	Rhagoletis cerasi	3.4713e-10	Bactrocera tsuneonis	1.035e-09	Bactrocera correcta
9.9919e-12	Anastrepha bahiensis	9.1825e-10	Anastrepha striata	8.917e-10	Anastrepha mburucuyae	9.1992e-10	Anastrepha distincta	9.1825e-10	Anastrepha striata	1.7907e-09	Anastrepha pseudoparallela			8.9756e-10	Anastrepha ornate	0.00026926	Anastrepha mburucuyae	0.00050512	Callistomyia flavilavris	0.00050512	Dacus smieroides	0.00033263	Carpomya pardalina	0.00050512	Dacus axanus	0.00050512	Rhagoletis boycei	0.00025265	Euphranta canadensis	0.00051808	Bactrocera correcta	2.8121e-06	Euphranta lemniscata	6.7562e-06	Rhagoletis cerasi	3.74e-07	Bactrocera distincta	1.5155e-11	Bactrocera papayae	3.7401e-07	Bactrocera tryoni	1.035e-09	Bactrocera correcta	8.3451e-08	Carpomya incompleta	3.4483e-10	Bactrocera caryeae	6.9397e-10	Bactrocera diversa
7.2896e-12	Rhagoletis striatella	9.1214e-10	Anastrepha manihoti	8.917e-10	Anastrepha schultzi	9.1825e-10	Anastrepha striata	9.1214e-10	Anastrepha manihoti	1.2512e-09	Anastrepha obliqua			8.9634e-10	Anastrepha ethalea	0.00026926	Anastrepha schultzi	0.00050512	Epochra Canadensis	0.00050512	Rhagoletis boycei	0.00026299	Anastrepha ocresia	0.00050512	Dacus smieroides	0.00050512	Rhagoletis juglandis	0.00025265	Gymnocarena diffusa	0.00035453	Bactrocera diversa	2.8093e-06	Bactrocera tryoni	5.6167e-06	Bactrocera curvipennis	3.74e-07	Bactrocera simulata	1.5155e-11	Adrama determinata	3.74e-07	Bactrocera distincta	6.9397e-10	Bactrocera diversa	1.035e-09	Bactrocera correcta	3.4105e-10	Bactrocera kandiensis	3.6229e-10	Bactrocera caudata
7.2884e-12	Anastrepha bistrigata	9.1042e-10	Anastrepha pickeli	8.917e-10	Anastrepha turicai	9.1214e-10	Anastrepha manihoti	9.1042e-10	Anastrepha pickeli	1.2438e-09	Anastrepha montei			8.9535e-10	Anastrepha consobrina	0.00026926	Anastrepha turicai	0.00040575	Anastrepha pallidipennis	0.00050512	Rhagoletis juglandis	0.00026299	Anastrepha suspensa	0.00050512	Rhagoletis boycei	0.00050512	Callistomyia flavilavris	0.00025265	Paracantha cultaris	0.00022884	Bactrocera tau	2.8084e-06	Bactrocera distincta	5.6167e-06	Bactrocera passiflorae	2.4169e-07	Rhagoletis cerasi	1.3664e-11	Adrama apicalis	3.74e-07	Bactrocera simulata	3.6229e-10	Bactrocera caudata	6.9397e-10	Bactrocera diversa	2.2732e-11	Bactrocera albistrigata	3.4713e-10	Bactrocera tsuneonis
7.2884e-12	Anastrepha minensis	8.9756e-10	Anastrepha ornate	8.917e-10	Anastrepha zuelaniae	9.1042e-10	Anastrepha pickeli	8.9756e-10	Anastrepha ornate	1.2329e-09	Anastrepha sororcula			8.917e-10	Anastrepha mburucuyae	0.00026926	Anastrepha zuelaniae	0.00033263	Carpomya pardalina	0.00050512	Callistomyia flavilavris	0.00025265	Rhagoletis basiola	0.00050512	Rhagoletis juglandis	0.00050512	Epochra Canadensis	0.00025265	Strauzia longipennis	0.00021241	Bactrocera caudata	2.8084e-06	Bactrocera simulata	5.6167e-06	Bactrocera xanthodes	8.3451e-08	Carpomya incompleta	1.1366e-11	Bactrocera arecae	2.4169e-07	Rhagoletis cerasi	3.4713e-10	Bactrocera tsuneonis	3.6229e-10	Bactrocera caudata	2.1241e-11	Dacus longicornis	3.4483e-10	Bactrocera caryeae
7.2884e-12	Anastrepha panamensis	8.9634e-10	Anastrepha ethalea	2.1865e-11	Anastrepha bezzii	8.9756e-10	Anastrepha ornate	8.9634e-10	Anastrepha ethalea	1.227e-09	Anastrepha daciformis			8.917e-10	Anastrepha schultzi	0.00018081	Rhagoletis cerasi	0.00026299	Anastrepha ocresia	0.00050512	Epochra Canadensis	0.00025265	Rhagoletis fausta	0.00050512	Callistomyia flavilavris	0.00040575	Anastrepha pallidipennis	0.00025265	Zonosemata electa	0.00018813	Bactrocera scutellata	2.5759e-07	Bactrocera correcta	2.9007e-06	Bactrocera tau	1.035e-09	Bactrocera correcta	1.1366e-11	Monacrostichus citricola	8.3451e-08	Carpomya incompleta	3.4483e-10	Bactrocera caryeae	3.4713e-10	Bactrocera tsuneonis	1.8943e-11	Bactrocera carambolae	3.4105e-10	Bactrocera kandiensis
7.2884e-12	Anastrepha parishi	8.9535e-10	Anastrepha consobrina	1.9294e-11	Toxotrypana curvicauda	8.9634e-10	Anastrepha ethalea	8.9535e-10	Anastrepha consobrina	1.2234e-09	Anastrepha punctata			8.917e-10	Anastrepha turicai	5.6015e-05	Toxotrypana curvicauda	0.00026299	Anastrepha suspensa	0.00040575	Anastrepha pallidipennis	0.00025265	Rhagoletis indifferens	0.00050512	Epochra Canadensis	0.00033263	Carpomya pardalina	0.00025262	Rhagoletis completa	0.00017985	Carpomya pardalina	1.7278e-07	Bactrocera diversa	2.896e-06	Bactrocera scutellata	6.9397e-10	Bactrocera diversa	9.8753e-12	Bactrocera tuberculata	1.035e-09	Bactrocera correcta	3.4483e-10	Adrama austeni	3.4483e-10	Bactrocera caryeae	1.5155e-11	Bactrocera pedestris	2.2732e-11	Bactrocera albistrigata
7.2884e-12	Anastrepha perdita	8.917e-10	Anastrepha mburucuyae	1.8714e-11	Anastrepha antunesi	8.9535e-10	Anastrepha consobrina	8.917e-10	Anastrepha mburucuyae	9.214e-10	Anastrepha serpentina			8.917e-10	Anastrepha zuelaniae	4.3645e-05	Anastrepha antunesi	0.00025265	Rhagoletis basiola	0.00033263	Carpomya pardalina	0.00025265	Rhagoletis mendax	0.00040575	Anastrepha pallidipennis	0.00026299	Anastrepha ocresia	0.00025256	Anastrepha margarita	0.00017984	Bactrocera tsuneonis	9.0458e-08	Bactrocera caudata	2.8941e-06	Bactrocera depressa	3.6229e-10	Bactrocera caudata	7.5773e-12	Bactrocera musae	6.9397e-10	Bactrocera diversa	3.4105e-10	Bactrocera kandiensis	3.4483e-10	Adrama austeni	1.5155e-11	Bactrocera papayae	2.1241e-11	Dacus longicornis
7.2884e-12	Rhagoletis boycei	8.917e-10	Anastrepha schultzi	1.8221e-11	Anastrepha leptozona	8.917e-10	Anastrepha mburucuyae	8.917e-10	Anastrepha schultzi	9.1992e-10	Anastrepha distincta			2.1865e-11	Anastrepha bezzii	4.0654e-05	Anastrepha leptozona	0.00025265	Rhagoletis fausta	0.00026299	Anastrepha ocresia	0.00025265	Rhagoletis ribicola	0.00033263	Carpomya pardalina	0.00026299	Anastrepha suspensa	0.00025256	Anastrepha nigrifascia	0.00017184	Bactrocera depressa	8.6689e-08	Bactrocera tsuneonis	2.8932e-06	Euphranta camelliae	3.4713e-10	Bactrocera tsuneonis	7.5773e-12	Bactrocera jarvisi	3.6229e-10	Bactrocera caudata	2.2732e-11	Bactrocera albistrigata	3.4105e-10	Bactrocera kandiensis	1.1366e-11	Bactrocera arecae	1.8943e-11	Bactrocera carambolae
7.2884e-12	Rhagoletis juglandis	8.917e-10	Anastrepha turicai	1.8221e-11	Anastrepha limae	8.917e-10	Anastrepha schultzi	8.917e-10	Anastrepha turicai	9.1825e-10	Anastrepha striata			1.9294e-11	Toxotrypana curvicauda	4.0654e-05	Anastrepha limae	0.00025265	Rhagoletis indifferens	0.00026299	Anastrepha suspensa	0.00025265	Rhagoletis tabellaria	0.00026299	Anastrepha ocresia	0.00025265	Rhagoletis basiola	0.00025256	Anastrepha passiflorae	0.00017169	Bactrocera caryeae	8.5747e-08	Bactrocera caryeae	2.8932e-06	Euphranta japonica	3.4483e-10	Bactrocera caryeae	7.5773e-12	Bactrocera bryoniae	3.4713e-10	Bactrocera tsuneonis	2.1241e-11	Dacus longicornis	2.2732e-11	Bactrocera albistrigata	1.1366e-11	Monacrostichus citricola	1.5155e-11	Bactrocera pedestris
5.895e-12	Anastrepha ocresia	8.917e-10	Anastrepha zuelaniae	1.3636e-11	Anastrepha rheediae	8.917e-10	Anastrepha turicai	8.917e-10	Anastrepha zuelaniae	9.1214e-10	Anastrepha manihoti			1.8714e-11	Anastrepha antunesi	3.6357e-05	Anastrepha ludens	0.00025265	Rhagoletis mendax	0.00025265	Rhagoletis basiola	0.00025265	Euphranta canadensis	0.00026299	Anastrepha suspensa	0.00025265	Rhagoletis fausta	0.00025256	Anastrepha steyskali	0.00017169	Adrama austeni	8.5747e-08	Adrama austeni	2.8131e-06	Bactrocera umbrosa	3.4483e-10	Adrama austeni	7.5773e-12	Bactrocera trivialis	3.4483e-10	Bactrocera caryeae	1.8943e-11	Bactrocera carambolae	2.1241e-11	Dacus longicornis	9.8753e-12	Bactrocera tuberculata	1.5155e-11	Bactrocera papayae
5.895e-12	Anastrepha suspensa	2.1865e-11	Anastrepha bezzii	1.2905e-11	Anastrepha ludens	8.917e-10	Anastrepha zuelaniae	2.1865e-11	Anastrepha bezzii	9.1042e-10	Anastrepha pickeli			1.8221e-11	Anastrepha leptozona	3.5515e-05	Anastrepha rheediae	0.00025265	Rhagoletis ribicola	0.00025265	Rhagoletis fausta	0.00025265	Gymnocarena diffusa	0.00025265	Rhagoletis basiola	0.00025265	Rhagoletis indifferens	0.00025256	Bactrocera aquilonis	0.0001644	Carpomya incompleta	8.4805e-08	Bactrocera kandiensis	2.8121e-06	Euphranta lemniscata	3.4105e-10	Bactrocera kandiensis	7.5773e-12	Bactrocera munda	3.4483e-10	Adrama austeni	1.5155e-11	Bactrocera pedestris	1.8943e-11	Bactrocera carambolae	7.5773e-12	Bactrocera musae	1.1366e-11	Monacrostichus citricola
5.8545e-12	Anastrepha pallidipennis	1.9294e-11	Toxotrypana curvicauda	1.0933e-11	Anastrepha sagittata	2.1865e-11	Anastrepha bezzii	1.9294e-11	Toxotrypana curvicauda	8.9756e-10	Anastrepha ornate			1.8221e-11	Anastrepha limae	2.7384e-05	Anastrepha bahiensis	0.00025265	Rhagoletis tabellaria	0.00025265	Rhagoletis indifferens	0.00025265	Paracantha cultaris	0.00025265	Rhagoletis fausta	0.00025265	Rhagoletis mendax	0.00025256	Bactrocera cacuminata	0.0001637	Euphranta camelliae	5.6526e-09	Bactrocera albistrigata	2.8093e-06	Bactrocera tryoni	2.2732e-11	Bactrocera albistrigata	7.5773e-12	Bactrocera minax	3.4105e-10	Bactrocera kandiensis	1.5155e-11	Bactrocera papayae	1.5155e-11	Bactrocera pedestris	7.5773e-12	Bactrocera jarvisi	9.8753e-12	Bactrocera tuberculata
3.6454e-12	Rhagoletis basiola	1.8714e-11	Anastrepha antunesi	9.9919e-12	Anastrepha bahiensis	1.9294e-11	Toxotrypana curvicauda	1.8714e-11	Anastrepha antunesi	8.9634e-10	Anastrepha ethalea			1.3636e-11	Anastrepha rheediae	2.5194e-05	Rhagoletis cingulata	0.00025265	Euphranta canadensis	0.00025265	Rhagoletis mendax	0.00025265	Strauzia longipennis	0.00025265	Rhagoletis indifferens	0.00025265	Rhagoletis ribicola	0.00025256	Bactrocera halfordiae	0.0001637	Euphranta japonica	5.6526e-09	Dacus longicornis	2.8084e-06	Bactrocera distincta	2.1241e-11	Dacus longicornis	7.5773e-12	Bactrocera occipitalis	2.2732e-11	Bactrocera albistrigata	1.5155e-11	Adrama determinata	1.5155e-11	Bactrocera papayae	7.5773e-12	Bactrocera bryoniae	7.5773e-12	Bactrocera musae
3.6454e-12	Rhagoletis fausta	1.8221e-11	Anastrepha leptozona	7.7816e-12	Anastrepha pallens	1.8714e-11	Anastrepha antunesi	1.8221e-11	Anastrepha leptozona	8.9535e-10	Anastrepha consobrina			1.2905e-11	Anastrepha ludens	2.4393e-05	Anastrepha sagittata	0.00025265	Zonosemata electa	0.00025265	Rhagoletis ribicola	0.00025265	Zonosemata electa	0.00025265	Rhagoletis mendax	0.00025265	Rhagoletis tabellaria	0.00025256	Bactrocera mayi	0.00016355	Bactrocera kandiensis	4.7105e-09	Bactrocera carambolae	2.8084e-06	Bactrocera simulata	1.8943e-11	Bactrocera carambolae	7.5773e-12	Dacus axanus	2.1241e-11	Dacus longicornis	1.3664e-11	Adrama apicalis	1.5155e-11	Adrama determinata	7.5773e-12	Bactrocera trivialis	7.5773e-12	Bactrocera jarvisi
3.6454e-12	Rhagoletis mendax	1.8221e-11	Anastrepha limae	7.2896e-12	Rhagoletis striatella	1.8221e-11	Anastrepha leptozona	1.8221e-11	Anastrepha limae	8.917e-10	Anastrepha mburucuyae			1.0933e-11	Anastrepha sagittata	1.6282e-05	Rhagoletis striatella	0.00025262	Rhagoletis completa	0.00025265	Rhagoletis tabellaria	0.00025262	Rhagoletis completa	0.00025265	Rhagoletis ribicola	0.00025265	Euphranta canadensis	0.00025256	Bactrocera opiliae	4.8857e-05	Bactrocera albistrigata	3.7684e-09	Bactrocera pedestris	2.5759e-07	Bactrocera correcta	1.5155e-11	Bactrocera pedestris	7.5773e-12	Dacus smieroides	1.8943e-11	Bactrocera carambolae	1.1366e-11	Bactrocera arecae	1.3664e-11	Adrama apicalis	7.5773e-12	Bactrocera munda	7.5773e-12	Bactrocera bryoniae
3.6454e-12	Rhagoletis ribicola	1.3636e-11	Anastrepha rheediae	7.2896e-12	Neotephritis finalis	1.8221e-11	Anastrepha limae	1.3636e-11	Anastrepha rheediae	8.917e-10	Anastrepha schultzi			9.9919e-12	Anastrepha bahiensis	1.6262e-05	Anastrepha bistrigata	0.00025256	Anastrepha margarita	0.00025265	Euphranta canadensis	0.00025256	Anastrepha margarita	0.00025265	Rhagoletis tabellaria	0.00025265	Zonosemata electa	0.00025256	Bactrocera versicolor	4.8857e-05	Dacus longicornis	3.7684e-09	Bactrocera papayae	1.7278e-07	Bactrocera diversa	1.5155e-11	Bactrocera papayae	7.5773e-12	Callistomyia flavilavris	1.5155e-11	Bactrocera pedestris	1.1366e-11	Monacrostichus citricola	1.1366e-11	Bactrocera arecae	7.5773e-12	Bactrocera minax	7.5773e-12	Bactrocera trivialis
3.6454e-12	Rhagoletis tabellaria	1.2905e-11	Anastrepha ludens	7.2884e-12	Anastrepha bistrigata	1.3636e-11	Anastrepha rheediae	1.2905e-11	Anastrepha ludens	8.917e-10	Anastrepha turicai			7.7816e-12	Anastrepha pallens	1.6262e-05	Anastrepha minensis	0.00025256	Anastrepha nigrifascia	0.00025265	Zonosemata electa	0.00025256	Anastrepha nigrifascia	0.00025265	Euphranta canadensis	0.00025262	Rhagoletis completa	0.00025256	Bactrocera nigra	4.0863e-05	Bactrocera umbrosa	3.7684e-09	Adrama apicalis	9.0458e-08	Bactrocera caudata	1.5155e-11	Adrama determinata	7.5773e-12	Epochra Canadensis	1.5155e-11	Bactrocera papayae	9.8753e-12	Bactrocera tuberculata	1.1366e-11	Monacrostichus citricola	7.5773e-12	Bactrocera occipitalis	7.5773e-12	Bactrocera munda
3.6454e-12	Euphranta canadensis	1.0933e-11	Anastrepha sagittata	7.2884e-12	Anastrepha minensis	1.2905e-11	Anastrepha ludens	1.0933e-11	Anastrepha sagittata	8.917e-10	Anastrepha zuelaniae			7.2896e-12	Rhagoletis striatella	1.6262e-05	Anastrepha pallidipennis	0.00025256	Anastrepha passiflorae	0.00025262	Rhagoletis completa	0.00025256	Anastrepha passiflorae	0.00025265	Gymnocarena diffusa	0.00025256	Anastrepha margarita	0.00025256	Bactrocera duplicata	4.0714e-05	Bactrocera carambolae	3.7684e-09	Adrama determinata	8.6689e-08	Bactrocera tsuneonis	1.3664e-11	Adrama apicalis	3.7887e-12	Bactrocera aquilonis	1.5155e-11	Adrama determinata	7.5773e-12	Bactrocera musae	9.8753e-12	Bactrocera tuberculata	7.5773e-12	Dacus axanus	7.5773e-12	Bactrocera minax
3.6454e-12	Zonosemata electa	9.9919e-12	Anastrepha bahiensis	7.2884e-12	Anastrepha panamensis	1.0933e-11	Anastrepha sagittata	9.9919e-12	Anastrepha bahiensis	2.1865e-11	Anastrepha bezzii			7.2896e-12	Neotephritis finalis	1.6262e-05	Anastrepha panamensis	0.00025256	Anastrepha steyskali	0.00025256	Anastrepha margarita	0.00025256	Anastrepha steyskali	0.00025265	Paracantha cultaris	0.00025256	Anastrepha nigrifascia	0.00025256	Bactrocera cucumis	3.272e-05	Euphranta lemniscata	2.8263e-09	Bactrocera arecae	8.5747e-08	Bactrocera caryeae	1.1366e-11	Bactrocera arecae	3.7887e-12	Bactrocera cacuminata	1.3664e-11	Adrama apicalis	7.5773e-12	Bactrocera jarvisi	7.5773e-12	Bactrocera musae	7.5773e-12	Dacus smieroides	7.5773e-12	Bactrocera occipitalis
3.6442e-12	Anastrepha margarita	7.7816e-12	Anastrepha pallens	7.2884e-12	Anastrepha parishi	9.9919e-12	Anastrepha bahiensis	7.7816e-12	Anastrepha pallens	1.9294e-11	Toxotrypana curvicauda			7.2884e-12	Anastrepha bistrigata	1.6262e-05	Anastrepha parishi	0.00025256	Bactrocera aquilonis	0.00025256	Anastrepha nigrifascia	0.00025256	Bactrocera aquilonis	0.00025265	Strauzia longipennis	0.00025256	Anastrepha passiflorae	0.00025256	Bactrocera frauenfeldi	3.2571e-05	Bactrocera pedestris	2.8263e-09	Bactrocera tuberculata	8.5747e-08	Adrama austeni	1.1366e-11	Monacrostichus citricola	3.7887e-12	Bactrocera halfordiae	1.1366e-11	Bactrocera arecae	7.5773e-12	Bactrocera bryoniae	7.5773e-12	Bactrocera jarvisi	7.5773e-12	Callistomyia flavilavris	7.5773e-12	Dacus axanus
3.6442e-12	Anastrepha nigrifascia	7.2896e-12	Rhagoletis striatella	7.2884e-12	Anastrepha perdita	7.7816e-12	Anastrepha pallens	7.2896e-12	Rhagoletis striatella	1.8714e-11	Anastrepha antunesi			7.2884e-12	Anastrepha minensis	1.6262e-05	Anastrepha perdita	0.00025256	Bactrocera cacuminata	0.00025256	Anastrepha passiflorae	0.00025256	Bactrocera cacuminata	0.00025265	Zonosemata electa	0.00025256	Anastrepha steyskali	0.00025256	Bactrocera jarvisi	3.2571e-05	Bactrocera papayae	2.8263e-09	Monacrostichus citricola	8.4805e-08	Bactrocera kandiensis	9.8753e-12	Bactrocera tuberculata	3.7887e-12	Bactrocera mayi	1.1366e-11	Monacrostichus citricola	7.5773e-12	Bactrocera trivialis	7.5773e-12	Bactrocera bryoniae	7.5773e-12	Epochra Canadensis	7.5773e-12	Dacus smieroides
3.6442e-12	Anastrepha passiflorae	7.2896e-12	Neotephritis finalis	7.2884e-12	Rhagoletis boycei	7.2896e-12	Rhagoletis striatella	7.2884e-12	Anastrepha bistrigata	1.8221e-11	Anastrepha leptozona			7.2884e-12	Anastrepha panamensis	1.1527e-05	Anastrepha ocresia	0.00025256	Bactrocera halfordiae	0.00025256	Anastrepha steyskali	0.00025256	Bactrocera halfordiae	0.00025262	Rhagoletis completa	0.00025256	Bactrocera aquilonis	0.00025256	Bactrocera neohumeralis	3.2571e-05	Adrama apicalis	1.8842e-09	Bactrocera musae	5.6526e-09	Bactrocera albistrigata	7.5773e-12	Bactrocera musae	3.7887e-12	Bactrocera opiliae	9.8753e-12	Bactrocera tuberculata	7.5773e-12	Bactrocera munda	7.5773e-12	Bactrocera trivialis	3.7887e-12	Bactrocera aquilonis	7.5773e-12	Callistomyia flavilavris
3.6442e-12	Anastrepha steyskali	7.2884e-12	Anastrepha bistrigata	7.2884e-12	Rhagoletis juglandis	7.2884e-12	Anastrepha bistrigata	7.2884e-12	Anastrepha minensis	1.8221e-11	Anastrepha limae			7.2884e-12	Anastrepha parishi	1.1527e-05	Anastrepha suspensa	0.00025256	Bactrocera mayi	0.00025256	Bactrocera aquilonis	0.00025256	Bactrocera mayi	0.00025256	Anastrepha margarita	0.00025256	Bactrocera cacuminata	0.00025256	Bactrocera philippinensis	3.2571e-05	Adrama determinata	1.8842e-09	Bactrocera jarvisi	5.6526e-09	Dacus longicornis	7.5773e-12	Bactrocera jarvisi	3.7887e-12	Bactrocera versicolor	7.5773e-12	Bactrocera musae	7.5773e-12	Bactrocera minax	7.5773e-12	Bactrocera munda	3.7887e-12	Bactrocera cacuminata	7.5773e-12	Epochra Canadensis
3.6442e-12	Rhagoletis lycopersella	7.2884e-12	Anastrepha minensis	5.895e-12	Anastrepha ocresia	7.2884e-12	Anastrepha minensis	7.2884e-12	Anastrepha panamensis	1.3636e-11	Anastrepha rheediae			7.2884e-12	Anastrepha perdita	8.2413e-06	Rhagoletis indifferens	0.00025256	Bactrocera opiliae	0.00025256	Bactrocera cacuminata	0.00025256	Bactrocera opiliae	0.00025256	Anastrepha nigrifascia	0.00025256	Bactrocera halfordiae	0.00025256	Bactrocera tryoni	2.4428e-05	Bactrocera arecae	1.8842e-09	Bactrocera bryoniae	4.7105e-09	Bactrocera carambolae	7.5773e-12	Bactrocera bryoniae	3.7887e-12	Bactrocera nigra	7.5773e-12	Bactrocera jarvisi	7.5773e-12	Bactrocera occipitalis	7.5773e-12	Bactrocera minax	3.7887e-12	Bactrocera halfordiae	3.7887e-12	Bactrocera aquilonis
3.6442e-12	Rhagoletis nova	7.2884e-12	Anastrepha panamensis	5.895e-12	Anastrepha suspensa	7.2884e-12	Anastrepha panamensis	7.2884e-12	Anastrepha parishi	1.2905e-11	Anastrepha ludens			7.2884e-12	Rhagoletis boycei	8.151e-06	Rhagoletis basiola	0.00025256	Bactrocera versicolor	0.00025256	Bactrocera halfordiae	0.00025256	Bactrocera versicolor	0.00025256	Anastrepha passiflorae	0.00025256	Bactrocera mayi	0.00025256	Bactrocera melas	2.4428e-05	Bactrocera tuberculata	1.8842e-09	Bactrocera trivialis	3.7684e-09	Bactrocera pedestris	7.5773e-12	Bactrocera trivialis	3.7887e-12	Bactrocera duplicata	7.5773e-12	Bactrocera bryoniae	7.5773e-12	Dacus axanus	7.5773e-12	Bactrocera occipitalis	3.7887e-12	Bactrocera mayi	3.7887e-12	Bactrocera cacuminata
3.6442e-12	Rhagoletis psalida	7.2884e-12	Anastrepha parishi	5.8545e-12	Anastrepha pallidipennis	7.2884e-12	Anastrepha parishi	7.2884e-12	Anastrepha perdita	1.0933e-11	Anastrepha sagittata			7.2884e-12	Rhagoletis juglandis	8.151e-06	Rhagoletis fausta	0.00025256	Bactrocera nigra	0.00025256	Bactrocera mayi	0.00025256	Bactrocera nigra	0.00025256	Anastrepha steyskali	0.00025256	Bactrocera opiliae	0.00025256	Bactrocera mutabilis	2.4428e-05	Monacrostichus citricola	1.8842e-09	Bactrocera munda	3.7684e-09	Bactrocera papayae	7.5773e-12	Bactrocera munda	3.7887e-12	Bactrocera cucumis	7.5773e-12	Bactrocera trivialis	7.5773e-12	Dacus smieroides	7.5773e-12	Dacus axanus	3.7887e-12	Bactrocera opiliae	3.7887e-12	Bactrocera halfordiae
3.6442e-12	Rhagoletis ramosae	7.2884e-12	Anastrepha perdita	3.6454e-12	Rhagoletis basiola	7.2884e-12	Anastrepha perdita	7.2884e-12	Rhagoletis boycei	9.9919e-12	Anastrepha bahiensis			5.895e-12	Anastrepha ocresia	8.151e-06	Rhagoletis mendax	0.00025256	Bactrocera duplicata	0.00025256	Bactrocera opiliae	0.00025256	Bactrocera duplicata	0.00025256	Bactrocera aquilonis	0.00025256	Bactrocera versicolor	0.00025256	Bactrocera trimaculata	1.6286e-05	Bactrocera musae	1.8842e-09	Bactrocera minax	3.7684e-09	Adrama apicalis	7.5773e-12	Bactrocera minax	3.7887e-12	Bactrocera frauenfeldi	7.5773e-12	Bactrocera munda	7.5773e-12	Callistomyia flavilavris	7.5773e-12	Dacus smieroides	3.7887e-12	Bactrocera versicolor	3.7887e-12	Bactrocera mayi
3.6442e-12	Rhagoletis suavis	7.2884e-12	Rhagoletis boycei	3.6454e-12	Rhagoletis fausta	7.2884e-12	Rhagoletis boycei	7.2884e-12	Rhagoletis juglandis	7.7816e-12	Anastrepha pallens			5.895e-12	Anastrepha suspensa	8.151e-06	Rhagoletis ribicola	0.00025256	Bactrocera cucumis	0.00025256	Bactrocera versicolor	0.00025256	Bactrocera cucumis	0.00025256	Bactrocera cacuminata	0.00025256	Bactrocera nigra	0.00025256	Dacus petioliformus	1.6286e-05	Bactrocera jarvisi	1.8842e-09	Bactrocera occipitalis	3.7684e-09	Adrama determinata	7.5773e-12	Bactrocera occipitalis	3.7887e-12	Bactrocera jarvisi	7.5773e-12	Bactrocera minax	7.5773e-12	Epochra Canadensis	7.5773e-12	Callistomyia flavilavris	3.7887e-12	Bactrocera nigra	3.7887e-12	Bactrocera opiliae
3.6442e-12	Rhagoletis zoqui	7.2884e-12	Rhagoletis juglandis	3.6454e-12	Rhagoletis mendax	7.2884e-12	Rhagoletis juglandis	5.895e-12	Anastrepha ocresia	7.2896e-12	Rhagoletis striatella			5.8545e-12	Anastrepha pallidipennis	8.151e-06	Rhagoletis tabellaria	0.00025256	Bactrocera frauenfeldi	0.00025256	Bactrocera nigra	0.00025256	Bactrocera frauenfeldi	0.00025256	Bactrocera halfordiae	0.00025256	Bactrocera duplicata	0.00025256	Dacus eumenoides	1.6286e-05	Bactrocera bryoniae	1.8842e-09	Dacus axanus	2.8263e-09	Bactrocera arecae	7.5773e-12	Dacus axanus	3.7887e-12	Bactrocera neohumeralis	7.5773e-12	Bactrocera occipitalis	3.7887e-12	Bactrocera aquilonis	7.5773e-12	Epochra Canadensis	3.7887e-12	Bactrocera duplicata	3.7887e-12	Bactrocera versicolor
2.2103e-12	Anastrepha manizaliensis	5.895e-12	Anastrepha ocresia	3.6454e-12	Rhagoletis ribicola	5.895e-12	Anastrepha ocresia	5.895e-12	Anastrepha suspensa	7.2884e-12	Anastrepha bistrigata			3.6454e-12	Rhagoletis basiola	8.151e-06	Euphranta canadensis	0.00025256	Bactrocera jarvisi	0.00025256	Bactrocera duplicata	0.00025256	Bactrocera jarvisi	0.00025256	Bactrocera mayi	0.00025256	Bactrocera cucumis	0.00025256	Dacus aequalis	1.6286e-05	Bactrocera trivialis	1.8842e-09	Dacus smieroides	2.8263e-09	Bactrocera tuberculata	7.5773e-12	Dacus smieroides	3.7887e-12	Bactrocera philippinensis	7.5773e-12	Dacus axanus	3.7887e-12	Bactrocera cacuminata	3.7887e-12	Bactrocera aquilonis	3.7887e-12	Bactrocera cucumis	3.7887e-12	Bactrocera nigra
2.7161e-17	Bactrocera curvipennis	5.895e-12	Anastrepha suspensa	3.6454e-12	Rhagoletis tabellaria	5.895e-12	Anastrepha suspensa	5.8545e-12	Anastrepha pallidipennis	7.2884e-12	Anastrepha minensis			3.6454e-12	Rhagoletis fausta	8.151e-06	Zonosemata electa	0.00025256	Bactrocera neohumeralis	0.00025256	Bactrocera cucumis	0.00025256	Bactrocera neohumeralis	0.00025256	Bactrocera opiliae	0.00025256	Bactrocera frauenfeldi	0.00025256	Rhagoletis lycopersella	1.6286e-05	Bactrocera munda	1.8842e-09	Callistomyia flavilavris	2.8263e-09	Monacrostichus citricola	7.5773e-12	Callistomyia flavilavris	3.7887e-12	Bactrocera melas	7.5773e-12	Dacus smieroides	3.7887e-12	Bactrocera halfordiae	3.7887e-12	Bactrocera cacuminata	3.7887e-12	Bactrocera frauenfeldi	3.7887e-12	Bactrocera duplicata
2.7161e-17	Bactrocera passiflorae	5.8545e-12	Anastrepha pallidipennis	3.6454e-12	Euphranta canadensis	5.8545e-12	Anastrepha pallidipennis	3.6454e-12	Rhagoletis basiola	7.2884e-12	Anastrepha panamensis			3.6454e-12	Rhagoletis mendax	8.1308e-06	Anastrepha margarita	0.00025256	Bactrocera philippinensis	0.00025256	Bactrocera frauenfeldi	0.00025256	Bactrocera philippinensis	0.00025256	Bactrocera versicolor	0.00025256	Bactrocera jarvisi	0.00025256	Rhagoletis nova	1.6286e-05	Bactrocera minax	1.8842e-09	Epochra Canadensis	1.8842e-09	Bactrocera musae	7.5773e-12	Epochra Canadensis	3.7887e-12	Bactrocera mutabilis	7.5773e-12	Callistomyia flavilavris	3.7887e-12	Bactrocera mayi	3.7887e-12	Bactrocera halfordiae	3.7887e-12	Bactrocera jarvisi	3.7887e-12	Bactrocera cucumis
2.7161e-17	Bactrocera xanthodes	3.6454e-12	Rhagoletis basiola	3.6454e-12	Gymnocarena diffusa	3.6454e-12	Rhagoletis basiola	3.6454e-12	Rhagoletis fausta	7.2884e-12	Anastrepha parishi			3.6454e-12	Rhagoletis ribicola	8.1308e-06	Anastrepha nigrifascia	0.00025256	Bactrocera tryoni	0.00025256	Bactrocera jarvisi	0.00025256	Bactrocera tryoni	0.00025256	Bactrocera nigra	0.00025256	Bactrocera neohumeralis	0.00025256	Rhagoletis psalida	1.6286e-05	Bactrocera occipitalis	9.421e-10	Bactrocera aquilonis	1.8842e-09	Bactrocera jarvisi	3.7887e-12	Bactrocera aquilonis	3.7887e-12	Bactrocera trimaculata	7.5773e-12	Epochra Canadensis	3.7887e-12	Bactrocera opiliae	3.7887e-12	Bactrocera mayi	3.7887e-12	Bactrocera neohumeralis	3.7887e-12	Bactrocera frauenfeldi
1.3581e-17	Bactrocera distincta	3.6454e-12	Rhagoletis fausta	3.6454e-12	Paracantha cultaris	3.6454e-12	Rhagoletis fausta	3.6454e-12	Rhagoletis mendax	7.2884e-12	Anastrepha perdita			3.6454e-12	Rhagoletis tabellaria	8.1308e-06	Anastrepha passiflorae	0.00025256	Bactrocera melas	0.00025256	Bactrocera neohumeralis	0.00025256	Bactrocera melas	0.00025256	Bactrocera duplicata	0.00025256	Bactrocera philippinensis	0.00025256	Rhagoletis ramosae	1.6286e-05	Dacus axanus	9.421e-10	Bactrocera cacuminata	1.8842e-09	Bactrocera bryoniae	3.7887e-12	Bactrocera cacuminata	3.7887e-12	Dacus petioliformus	3.7887e-12	Bactrocera aquilonis	3.7887e-12	Bactrocera versicolor	3.7887e-12	Bactrocera opiliae	3.7887e-12	Bactrocera philippinensis	3.7887e-12	Bactrocera jarvisi
1.3581e-17	Bactrocera simulata	3.6454e-12	Rhagoletis mendax	3.6454e-12	Strauzia longipennis	3.6454e-12	Rhagoletis mendax	3.6454e-12	Rhagoletis ribicola	7.2884e-12	Rhagoletis boycei			3.6454e-12	Euphranta canadensis	8.1308e-06	Anastrepha steyskali	0.00025256	Bactrocera mutabilis	0.00025256	Bactrocera philippinensis	0.00025256	Bactrocera mutabilis	0.00025256	Bactrocera cucumis	0.00025256	Bactrocera tryoni	0.00025256	Rhagoletis suavis	1.6286e-05	Dacus smieroides	9.421e-10	Bactrocera halfordiae	1.8842e-09	Bactrocera trivialis	3.7887e-12	Bactrocera halfordiae	3.7887e-12	Dacus eumenoides	3.7887e-12	Bactrocera cacuminata	3.7887e-12	Bactrocera nigra	3.7887e-12	Bactrocera versicolor	3.7887e-12	Bactrocera melas	3.7887e-12	Bactrocera neohumeralis
		3.6454e-12	Rhagoletis ribicola	3.6454e-12	Zonosemata electa	3.6454e-12	Rhagoletis ribicola	3.6454e-12	Rhagoletis tabellaria	7.2884e-12	Rhagoletis juglandis			3.6454e-12	Gymnocarena diffusa	8.1308e-06	Rhagoletis lycopersella	0.00025256	Bactrocera trimaculata	0.00025256	Bactrocera tryoni	0.00025256	Bactrocera trimaculata	0.00025256	Bactrocera frauenfeldi	0.00025256	Bactrocera melas	0.00025256	Rhagoletis zoqui	1.6286e-05	Callistomyia flavilavris	9.421e-10	Bactrocera mayi	1.8842e-09	Bactrocera munda	3.7887e-12	Bactrocera mayi	3.7887e-12	Dacus aequalis	3.7887e-12	Bactrocera halfordiae	3.7887e-12	Bactrocera duplicata	3.7887e-12	Bactrocera nigra	3.7887e-12	Bactrocera mutabilis	3.7887e-12	Bactrocera philippinensis
		3.6454e-12	Rhagoletis tabellaria	3.6442e-12	Anastrepha margarita	3.6454e-12	Rhagoletis tabellaria	3.6454e-12	Euphranta canadensis	5.895e-12	Anastrepha ocresia			3.6454e-12	Paracantha cultaris	8.1308e-06	Rhagoletis nova	0.00025256	Dacus petioliformus	0.00025256	Bactrocera melas	0.00025256	Dacus petioliformus	0.00025256	Bactrocera jarvisi	0.00025256	Bactrocera mutabilis	0.00025256	Dirioxa confusa	1.6286e-05	Epochra Canadensis	9.421e-10	Bactrocera opiliae	1.8842e-09	Bactrocera minax	3.7887e-12	Bactrocera opiliae	3.7887e-12	Dirioxa confusa	3.7887e-12	Bactrocera mayi	3.7887e-12	Bactrocera cucumis	3.7887e-12	Bactrocera duplicata	3.7887e-12	Bactrocera trimaculata	3.7887e-12	Bactrocera melas
		3.6454e-12	Euphranta canadensis	3.6442e-12	Anastrepha nigrifascia	3.6454e-12	Euphranta canadensis	3.6454e-12	Zonosemata electa	5.895e-12	Anastrepha suspensa			3.6454e-12	Strauzia longipennis	8.1308e-06	Rhagoletis psalida	0.00025256	Dacus eumenoides	0.00025256	Bactrocera mutabilis	0.00025256	Dacus eumenoides	0.00025256	Bactrocera neohumeralis	0.00025256	Bactrocera trimaculata	0.00025256	Dirioxa pornia	1.1641e-05	Rhagoletis cerasi	9.421e-10	Bactrocera versicolor	1.8842e-09	Bactrocera occipitalis	3.7887e-12	Bactrocera versicolor	3.7887e-12	Monacrostichus malaysiae	3.7887e-12	Bactrocera opiliae	3.7887e-12	Bactrocera frauenfeldi	3.7887e-12	Bactrocera cucumis	3.7887e-12	Dacus petioliformus	3.7887e-12	Bactrocera mutabilis
		3.6454e-12	Gymnocarena diffusa	3.6442e-12	Anastrepha passiflorae	3.6454e-12	Zonosemata electa	3.6442e-12	Anastrepha margarita	5.8545e-12	Anastrepha pallidipennis			3.6454e-12	Zonosemata electa	8.1308e-06	Rhagoletis suavis	0.00025256	Dacus aequalis	0.00025256	Bactrocera trimaculata	0.00025256	Dacus aequalis	0.00025256	Bactrocera philippinensis	0.00025256	Dacus petioliformus	0.00025256	Monacrostichus malaysiae	8.5902e-06	Dirioxa pornia	9.421e-10	Bactrocera nigra	1.8842e-09	Dacus axanus	3.7887e-12	Bactrocera nigra	5.9751e-13	Capparimyia savastani	3.7887e-12	Bactrocera versicolor	3.7887e-12	Bactrocera jarvisi	3.7887e-12	Bactrocera frauenfeldi	3.7887e-12	Dacus eumenoides	3.7887e-12	Bactrocera trimaculata
		3.6454e-12	Paracantha cultaris	3.6442e-12	Anastrepha steyskali	3.6442e-12	Anastrepha margarita	3.6442e-12	Anastrepha nigrifascia	3.6454e-12	Rhagoletis basiola			3.6442e-12	Anastrepha margarita	7.3828e-10	Bactrocera curvipennis	0.00025256	Rhagoletis lycopersella	0.00025256	Dacus petioliformus	0.00025256	Rhagoletis lycopersella	0.00025256	Bactrocera tryoni	0.00025256	Dacus eumenoides	0.00015319	Anastrepha manizaliensis	8.2919e-06	Bactrocera tryoni	9.421e-10	Bactrocera duplicata	1.8842e-09	Dacus smieroides	3.7887e-12	Bactrocera duplicata			3.7887e-12	Bactrocera nigra	3.7887e-12	Bactrocera neohumeralis	3.7887e-12	Bactrocera jarvisi	3.7887e-12	Dacus aequalis	3.7887e-12	Dacus petioliformus
		3.6454e-12	Strauzia longipennis	3.6442e-12	Rhagoletis lycopersella	3.6442e-12	Anastrepha nigrifascia	3.6442e-12	Anastrepha passiflorae	3.6454e-12	Rhagoletis fausta			3.6442e-12	Anastrepha nigrifascia	7.3828e-10	Bactrocera passiflorae	0.00025256	Rhagoletis nova	0.00025256	Dacus eumenoides	0.00025256	Rhagoletis nova	0.00025256	Bactrocera melas	0.00025256	Dacus aequalis	3.9962e-05	Carpomya incompleta	8.1428e-06	Bactrocera aquilonis	9.421e-10	Bactrocera cucumis	1.8842e-09	Callistomyia flavilavris	3.7887e-12	Bactrocera cucumis			3.7887e-12	Bactrocera duplicata	3.7887e-12	Bactrocera philippinensis	3.7887e-12	Bactrocera neohumeralis	3.7887e-12	Dirioxa confusa	3.7887e-12	Dacus eumenoides
		3.6454e-12	Zonosemata electa	3.6442e-12	Rhagoletis nova	3.6442e-12	Anastrepha passiflorae	3.6442e-12	Anastrepha steyskali	3.6454e-12	Rhagoletis mendax			3.6442e-12	Anastrepha passiflorae	7.3828e-10	Bactrocera xanthodes	0.00025256	Rhagoletis psalida	0.00025256	Dacus aequalis	0.00025256	Rhagoletis psalida	0.00025256	Bactrocera mutabilis	0.00025256	Rhagoletis lycopersella	3.9795e-05	Capparimyia savastani	8.1428e-06	Bactrocera cacuminata	9.421e-10	Bactrocera frauenfeldi	1.8842e-09	Epochra Canadensis	3.7887e-12	Bactrocera frauenfeldi			3.7887e-12	Bactrocera cucumis	3.7887e-12	Bactrocera melas	3.7887e-12	Bactrocera philippinensis	3.7887e-12	Monacrostichus malaysiae	3.7887e-12	Dacus aequalis
		3.6442e-12	Anastrepha margarita	3.6442e-12	Rhagoletis psalida	3.6442e-12	Anastrepha steyskali	3.6442e-12	Rhagoletis lycopersella	3.6454e-12	Rhagoletis ribicola			3.6442e-12	Anastrepha steyskali	3.6914e-10	Bactrocera distincta	0.00025256	Rhagoletis ramosae	0.00025256	Rhagoletis lycopersella	0.00025256	Rhagoletis ramosae	0.00025256	Bactrocera trimaculata	0.00025256	Rhagoletis nova	3.8472e-06	Rhagoletis cerasi	8.1428e-06	Bactrocera halfordiae	9.421e-10	Bactrocera jarvisi	9.421e-10	Bactrocera aquilonis	3.7887e-12	Bactrocera jarvisi			3.7887e-12	Bactrocera frauenfeldi	3.7887e-12	Bactrocera mutabilis	3.7887e-12	Bactrocera melas	5.9751e-13	Capparimyia savastani	3.7887e-12	Dirioxa confusa
		3.6442e-12	Anastrepha nigrifascia	3.6442e-12	Rhagoletis ramosae	3.6442e-12	Rhagoletis lycopersella	3.6442e-12	Rhagoletis nova	3.6454e-12	Rhagoletis tabellaria			3.6442e-12	Rhagoletis lycopersella	3.6914e-10	Bactrocera simulata	0.00025256	Rhagoletis suavis	0.00025256	Rhagoletis nova	0.00025256	Rhagoletis suavis	0.00025256	Dacus petioliformus	0.00025256	Rhagoletis psalida	1.8824e-09	Bactrocera curvipennis	8.1428e-06	Bactrocera mayi	9.421e-10	Bactrocera neohumeralis	9.421e-10	Bactrocera cacuminata	3.7887e-12	Bactrocera neohumeralis			3.7887e-12	Bactrocera jarvisi	3.7887e-12	Bactrocera trimaculata	3.7887e-12	Bactrocera mutabilis			3.7887e-12	Monacrostichus malaysiae
		3.6442e-12	Anastrepha passiflorae	3.6442e-12	Rhagoletis suavis	3.6442e-12	Rhagoletis nova	3.6442e-12	Rhagoletis psalida	3.6454e-12	Euphranta canadensis			3.6442e-12	Rhagoletis nova			0.00025256	Rhagoletis zoqui	0.00025256	Rhagoletis psalida	0.00025256	Rhagoletis zoqui	0.00025256	Dacus eumenoides	0.00025256	Rhagoletis ramosae	1.8824e-09	Bactrocera passiflorae	8.1428e-06	Bactrocera opiliae	9.421e-10	Bactrocera philippinensis	9.421e-10	Bactrocera halfordiae	3.7887e-12	Bactrocera philippinensis			3.7887e-12	Bactrocera neohumeralis	3.7887e-12	Dacus petioliformus	3.7887e-12	Bactrocera trimaculata
		3.6442e-12	Anastrepha steyskali	3.6442e-12	Rhagoletis zoqui	3.6442e-12	Rhagoletis psalida	3.6442e-12	Rhagoletis ramosae	3.6454e-12	Zonosemata electa			3.6442e-12	Rhagoletis psalida			0.00025256	Dirioxa confusa	0.00025256	Rhagoletis ramosae	0.00025256	Dirioxa confusa	0.00025256	Dacus aequalis	0.00025256	Rhagoletis suavis	1.8824e-09	Bactrocera xanthodes	8.1428e-06	Bactrocera versicolor	9.421e-10	Bactrocera melas	9.421e-10	Bactrocera mayi	3.7887e-12	Bactrocera melas			3.7887e-12	Bactrocera philippinensis	3.7887e-12	Dacus eumenoides	3.7887e-12	Dacus petioliformus
		3.6442e-12	Rhagoletis lycopersella	2.2103e-12	Anastrepha manizaliensis	3.6442e-12	Rhagoletis ramosae	3.6442e-12	Rhagoletis suavis	3.6442e-12	Anastrepha margarita			3.6442e-12	Rhagoletis ramosae			0.00025256	Dirioxa pornia	0.00025256	Rhagoletis suavis	0.00025256	Dirioxa pornia	0.00025256	Rhagoletis lycopersella	0.00025256	Rhagoletis zoqui	9.4121e-10	Bactrocera distincta	8.1428e-06	Bactrocera nigra	9.421e-10	Bactrocera mutabilis	9.421e-10	Bactrocera opiliae	3.7887e-12	Bactrocera mutabilis			3.7887e-12	Bactrocera melas	3.7887e-12	Dacus aequalis	3.7887e-12	Dacus eumenoides
		3.6442e-12	Rhagoletis nova	2.7161e-17	Bactrocera curvipennis	3.6442e-12	Rhagoletis suavis	3.6442e-12	Rhagoletis zoqui	3.6442e-12	Anastrepha nigrifascia			3.6442e-12	Rhagoletis suavis			0.00025256	Monacrostichus malaysiae	0.00025256	Rhagoletis zoqui	0.00025256	Monacrostichus malaysiae	0.00025256	Rhagoletis nova	0.00025256	Dirioxa confusa	9.4121e-10	Bactrocera simulata	8.1428e-06	Bactrocera duplicata	9.421e-10	Bactrocera trimaculata	9.421e-10	Bactrocera versicolor	3.7887e-12	Bactrocera trimaculata			3.7887e-12	Bactrocera mutabilis	3.7887e-12	Dirioxa confusa	3.7887e-12	Dacus aequalis
		3.6442e-12	Rhagoletis psalida	2.7161e-17	Bactrocera passiflorae	3.6442e-12	Rhagoletis zoqui	2.2103e-12	Anastrepha manizaliensis	3.6442e-12	Anastrepha passiflorae			3.6442e-12	Rhagoletis zoqui			0.00015319	Anastrepha manizaliensis	0.00025256	Dirioxa confusa	0.00015319	Anastrepha manizaliensis	0.00025256	Rhagoletis psalida	0.00025256	Dirioxa pornia			8.1428e-06	Bactrocera cucumis	9.421e-10	Dacus petioliformus	9.421e-10	Bactrocera nigra	3.7887e-12	Dacus petioliformus			3.7887e-12	Bactrocera trimaculata	3.7887e-12	Monacrostichus malaysiae	3.7887e-12	Dirioxa confusa
		3.6442e-12	Rhagoletis ramosae	2.7161e-17	Bactrocera xanthodes	2.2103e-12	Anastrepha manizaliensis	2.7161e-17	Bactrocera curvipennis	3.6442e-12	Anastrepha steyskali			2.2103e-12	Anastrepha manizaliensis			3.9962e-05	Carpomya incompleta	0.00025256	Dirioxa pornia	3.9962e-05	Carpomya incompleta	0.00025256	Rhagoletis ramosae	0.00025256	Monacrostichus malaysiae			8.1428e-06	Bactrocera frauenfeldi	9.421e-10	Dacus eumenoides	9.421e-10	Bactrocera duplicata	3.7887e-12	Dacus eumenoides			3.7887e-12	Dacus petioliformus	5.9751e-13	Capparimyia savastani	3.7887e-12	Monacrostichus malaysiae
		3.6442e-12	Rhagoletis suavis	1.3581e-17	Bactrocera distincta	2.7161e-17	Bactrocera curvipennis	2.7161e-17	Bactrocera passiflorae	3.6442e-12	Rhagoletis lycopersella			2.7161e-17	Bactrocera curvipennis			3.9795e-05	Capparimyia savastani	0.00025256	Monacrostichus malaysiae	3.9795e-05	Capparimyia savastani	0.00025256	Rhagoletis suavis	0.00015319	Anastrepha manizaliensis			8.1428e-06	Bactrocera jarvisi	9.421e-10	Dacus aequalis	9.421e-10	Bactrocera cucumis	3.7887e-12	Dacus aequalis			3.7887e-12	Dacus eumenoides			5.9751e-13	Capparimyia savastani
		3.6442e-12	Rhagoletis zoqui	1.3581e-17	Bactrocera simulata	2.7161e-17	Bactrocera passiflorae	2.7161e-17	Bactrocera xanthodes	3.6442e-12	Rhagoletis nova			2.7161e-17	Bactrocera passiflorae			3.8472e-06	Rhagoletis cerasi	0.00015319	Anastrepha manizaliensis	3.8472e-06	Rhagoletis cerasi	0.00025256	Rhagoletis zoqui	3.9962e-05	Carpomya incompleta			8.1428e-06	Bactrocera neohumeralis	9.421e-10	Dirioxa confusa	9.421e-10	Bactrocera frauenfeldi	3.7887e-12	Dirioxa confusa			3.7887e-12	Dacus aequalis
		2.2103e-12	Anastrepha manizaliensis			2.7161e-17	Bactrocera xanthodes	1.3581e-17	Bactrocera distincta	3.6442e-12	Rhagoletis psalida			2.7161e-17	Bactrocera xanthodes			1.8824e-09	Bactrocera curvipennis	3.9962e-05	Carpomya incompleta	1.8824e-09	Bactrocera curvipennis	0.00025256	Dirioxa confusa	3.9795e-05	Capparimyia savastani			8.1428e-06	Bactrocera philippinensis	9.421e-10	Monacrostichus malaysiae	9.421e-10	Bactrocera jarvisi	3.7887e-12	Monacrostichus malaysiae			3.7887e-12	Dirioxa confusa
		2.7161e-17	Bactrocera curvipennis			1.3581e-17	Bactrocera distincta	1.3581e-17	Bactrocera simulata	3.6442e-12	Rhagoletis ramosae			1.3581e-17	Bactrocera distincta			1.8824e-09	Bactrocera passiflorae	3.9795e-05	Capparimyia savastani	1.8824e-09	Bactrocera passiflorae	0.00025256	Dirioxa pornia	3.8472e-06	Rhagoletis cerasi			8.1428e-06	Bactrocera melas	4.4151e-10	Capparimyia savastani	9.421e-10	Bactrocera neohumeralis	5.9751e-13	Capparimyia savastani			3.7887e-12	Monacrostichus malaysiae
		2.7161e-17	Bactrocera passiflorae			1.3581e-17	Bactrocera simulata			3.6442e-12	Rhagoletis suavis			1.3581e-17	Bactrocera simulata			1.8824e-09	Bactrocera xanthodes	3.8472e-06	Rhagoletis cerasi	1.8824e-09	Bactrocera xanthodes	0.00025256	Monacrostichus malaysiae	1.8824e-09	Bactrocera curvipennis			8.1428e-06	Bactrocera mutabilis			9.421e-10	Bactrocera philippinensis					5.9751e-13	Capparimyia savastani
		2.7161e-17	Bactrocera xanthodes							3.6442e-12	Rhagoletis zoqui							9.4121e-10	Bactrocera distincta	1.8824e-09	Bactrocera curvipennis	9.4121e-10	Bactrocera distincta	0.00015319	Anastrepha manizaliensis	1.8824e-09	Bactrocera passiflorae			8.1428e-06	Bactrocera trimaculata			9.421e-10	Bactrocera melas
		1.3581e-17	Bactrocera distincta							2.2103e-12	Anastrepha manizaliensis							9.4121e-10	Bactrocera simulata	1.8824e-09	Bactrocera passiflorae	9.4121e-10	Bactrocera simulata	3.9962e-05	Carpomya incompleta	1.8824e-09	Bactrocera xanthodes			8.1428e-06	Dacus petioliformus			9.421e-10	Bactrocera mutabilis
		1.3581e-17	Bactrocera simulata							2.7161e-17	Bactrocera curvipennis									1.8824e-09	Bactrocera xanthodes			3.9795e-05	Capparimyia savastani	9.4121e-10	Bactrocera distincta			8.1428e-06	Dacus eumenoides			9.421e-10	Bactrocera trimaculata
										2.7161e-17	Bactrocera passiflorae									9.4121e-10	Bactrocera distincta			3.8472e-06	Rhagoletis cerasi	9.4121e-10	Bactrocera simulata			8.1428e-06	Dacus aequalis			9.421e-10	Dacus petioliformus
										2.7161e-17	Bactrocera xanthodes									9.4121e-10	Bactrocera simulata			1.8824e-09	Bactrocera curvipennis					8.1428e-06	Dirioxa confusa			9.421e-10	Dacus eumenoides
										1.3581e-17	Bactrocera distincta													1.8824e-09	Bactrocera passiflorae					8.1428e-06	Monacrostichus malaysiae			9.421e-10	Dacus aequalis
										1.3581e-17	Bactrocera simulata													1.8824e-09	Bactrocera xanthodes					3.8091e-06	Capparimyia savastani			9.421e-10	Dirioxa confusa
																								9.4121e-10	Bactrocera distincta					2.9828e-07	Bactrocera curvipennis			9.421e-10	Monacrostichus malaysiae
																								9.4121e-10	Bactrocera simulata					2.9828e-07	Bactrocera passiflorae			4.4151e-10	Capparimyia savastani
																														2.9828e-07	Bactrocera xanthodes
																														1.4914e-07	Bactrocera distincta
																														1.4914e-07	Bactrocera simulata
[truncated: 186 more columns]
